1 **Divergent clonal differentiation trajectories of T cell exhaustion**

2  
3 Bence Daniel<sup>1,2,9</sup>, Kathryn E. Yost<sup>2,9</sup>, Katalin Sandor<sup>1</sup>, Yu Xia<sup>4</sup>, Yanyan Qi<sup>1</sup>, Kamir J.  
4 Hiam-Galvez<sup>1</sup>, Stefanie L. Meier<sup>1,5</sup>, Julia A. Belk<sup>1</sup>, Josephine R. Giles<sup>6,7,8</sup>, E. John  
5 Wherry<sup>6,7,8</sup>, Howard Y. Chang<sup>2,3\*</sup>, Takeshi Egawa<sup>4\*</sup>, Ansuman T. Satpathy<sup>1,5\*#</sup>

6  
7 <sup>1</sup>Department of Pathology, Stanford University, Stanford, CA, USA.

8 <sup>2</sup>Center for Personal Dynamic Regulomes, Stanford University, Stanford, CA, USA.

9 <sup>3</sup>Howard Hughes Medical Institute, Stanford University, Stanford, CA, USA.

10 <sup>4</sup>Department of Pathology and Immunology, Washington University School of Medicine,  
11 MO, St. Louis.

12 <sup>5</sup>Parker Institute for Cancer Immunotherapy, San Francisco, CA 94129, USA.

13 <sup>6</sup>Department of Systems Pharmacology and Translational Therapeutics, University of  
14 Pennsylvania, Philadelphia, PA, USA.

15 <sup>7</sup>Institute for Immunology, Perelman School of Medicine, University of Pennsylvania,  
16 Philadelphia, PA, USA.

17 <sup>8</sup>Parker Institute for Cancer Immunotherapy at University of Pennsylvania, Philadelphia,  
18 PA, USA.

19 <sup>9</sup>*These authors contributed equally to this work.*

20 \**Co-senior authors*

21 #*Corresponding author*

22  
23 *To whom correspondence should be addressed. E-mail: [satpathy@stanford.edu](mailto:satpathy@stanford.edu)*

24  
25 Key words: T cell exhaustion, single-cell genomics, clonal T cell differentiation, chronic  
26 viral infection

27  
28  
29  
30  
31  
32  
33  
34  
35  
36  
37  
38  
39  
40  
41  
42  
43  
44  
45  
46

47 **SUMMARY**

48 T cells activated by chronic antigen exposure in the setting of viral infections or cancer  
49 can adopt an exhausted T cell (Tex) state, characterized by reduced effector function  
50 and proliferative capacity, and the upregulation of inhibitory receptors. However,  
51 whether all antigen-specific T cell clones follow the same molecular and cellular Tex  
52 differentiation trajectory remains unclear. Here, we generate a single-cell multi-omic  
53 atlas of T cell exhaustion that redefines the phenotypic diversity and molecular  
54 regulation of Tex phenotypes. Longitudinal analysis during chronic viral infection  
55 identifies an early effector phenotype that is epigenetically primed for Tex differentiation  
56 and two late-stage Tex cell states with either a terminal exhaustion or a killer cell lectin-  
57 like receptor (KLR)-expressing cytotoxic gene signature. We define clonal trajectories of  
58 antigen-specific T cells using paired single-cell RNA and T cell receptor sequencing and  
59 reveal distinct differentiation trajectories resulting in terminal Tex-biased, KLR Tex-  
60 biased, or divergent clones that differentiate into both phenotypes. Comparison of Tex  
61 phenotypes among shared T cell clones that traffic to multiple organs reveals that clonal  
62 differentiation trajectories are maintained across tissues. Finally, we show that  
63 differences in clonal differentiation trajectory are driven by TCR signal strength,  
64 whereby high-affinity T cell clones preferentially adopt a terminal Tex fate, while low-  
65 affinity clones adopt an effector-like KLR Tex fate that is detectable long-term but  
66 depleted in high antigen settings. These findings reveal clonal heterogeneity in the T  
67 cell response to chronic antigen and genomic programs that underlie Tex fates and  
68 persistence.

69

70 **Highlights**

- 71 • A single-cell atlas of T cell exhaustion identifies novel early effector and KLR Tex  
72 states.
- 73 • Clonal T cell analysis defines divergent differentiation trajectories during chronic  
74 viral infection leading to terminal and KLR Tex fates.
- 75 • The heterogeneity of the Tex pool arises from three primary differentiation  
76 patterns and are differentially persistent in the setting of high antigen.
- 77 • Clonal Tex differentiation patterns are conserved across organ sites and driven  
78 by TCR signal strength.

79

80

81

82

83

84

85

86

87

88

89

90

91

92

93

## 94 Introduction

95 Chronic antigen exposure during chronic viral infections and cancer leads to  
96 impaired CD8<sup>+</sup> T cell responses, termed T cell exhaustion [1, 2]. Exhausted T cells  
97 (Tex) are characterized by reduced effector function, diminished proliferative capacity,  
98 and high expression of inhibitory receptors, including PD-1, LAG-3, and TIM3. However,  
99 Tex are able to maintain some effector functions and persist long-term, suggesting that  
100 T cell exhaustion may represent a mechanism to control pathogen burden while  
101 maintaining immune homeostasis [3, 4]. Recent studies have identified heterogeneity in  
102 Tex phenotypes, which are characterized by distinct surface receptors, functionality,  
103 proliferative capacity, and tissue localization during chronic viral infections and cancer  
104 [5-12]. Some of these studies have proposed a linear differentiation model, whereby  
105 progenitor Tex (Tex<sup>prog</sup>; marked by expression of TCF1 and CXCR5) self-renew and  
106 maintain downstream Tex subsets, including CX3CR1<sup>+</sup>PD-1<sup>+</sup> intermediate Tex (Tex<sup>int</sup>)  
107 with proliferative, cytolytic and memory potential, and PD-1<sup>+</sup> TIM3<sup>+</sup> terminal Tex  
108 (Tex<sup>term</sup>; marked by high expression of inhibitory receptors, and limited effector or  
109 proliferative potential) [5-9, 13, 14, 60]. These subpopulations exhibit distinct epigenetic  
110 states and rely on distinct transcription factors (TFs). TCF1 (encoded by *Tcf7*) and  
111 BACH2 are indispensable for the formation of the Tex<sup>prog</sup> phenotype, while the high  
112 mobility group TF, TOX, orchestrates the establishment and maintenance of the  
113 molecular program of exhaustion in all Tex states, including Tex<sup>term</sup>, and is required for  
114 their survival [4, 7, 15-19]. Finally, these Tex populations are further distinguished by  
115 their ability to respond to immune checkpoint blockade (ICB); Tex<sup>term</sup> possess a stable  
116 epigenetic program and cannot be efficiently reinvigorated by ICB, while Tex<sup>prog</sup> can  
117 proliferate in response to ICB and may be important for the therapeutic responses [3, 6,  
118 20]. Despite these advances, we lack a comprehensive view of Tex states, their clonal  
119 relationships, and the molecular programming underlying their differentiation,  
120 particularly in polyclonal T cell responses.

121 Here, we generate a comprehensive atlas of Tex differentiation using single-cell  
122 chromatin accessibility, transcriptome, and T cell receptor (TCR) sequencing of antigen-  
123 specific CD8<sup>+</sup> T cells in the setting of chronic lymphocytic choriomeningitis virus (LCMV)  
124 infection. We discover previously unappreciated Tex subsets, including an early effector  
125 exhausted subset (Tex<sup>eff</sup>) in the early phase of infection that initiates the molecular  
126 program of exhaustion, and a killer cell lectin-like receptor-expressing Tex subset  
127 (Tex<sup>KLR</sup>) as a late-stage phenotype concurrent with terminal Tex, which suggests a  
128 divergent developmental path during Tex differentiation. T cell clone tracing based on  
129 paired scRNA/TCR-seq nominates unexpected diversity in Tex differentiation  
130 trajectories; namely, chronic antigen-specific T cell clones can adopt Tex<sup>term</sup>-biased,  
131 Tex<sup>KLR</sup>-biased, or divergent fates, comprising both cell types. Multi-organ clonal analysis  
132 reveals that Tex clones traffic to multiple organ sites and that their differentiation  
133 trajectories are conserved across tissues; however, Tex<sup>KLR</sup>-biased clones are depleted  
134 in the liver, suggesting that Tex<sup>term</sup> cells may be phenotypically adapted for high-antigen  
135 tissue microenvironments. Finally, we show that clone behaviors are programmed by  
136 TCR affinity to cognate antigen; high-affinity TCR clones are biased towards a Tex<sup>term</sup>  
137 differentiation trajectory, while low-affinity TCR clones are biased towards a Tex<sup>KLR</sup>  
138 trajectory. Overall, these results provide an in-depth view of the gene regulatory

139 programs and clonal dynamics of Tex states during chronic infection and suggest that a  
140 polyclonal T cell response to chronic antigen may balance T cell states that perform  
141 effector and memory functions.

## 142 Results

### 143 144 **A multi-omic single-cell atlas of CD8<sup>+</sup> T cell differentiation during acute and** 145 **chronic viral infection.**

146 To profile CD8<sup>+</sup> T cell differentiation during T cell exhaustion, we used mouse  
147 models of acute (LCMV Armstrong – Arm) or chronic (LCMV Clone 13 – C13) viral  
148 infection. These two viral strains only differ by two amino acids, and the  
149 immunodominant epitopes are identical, enabling direct comparisons of antigen-specific  
150 T cell responses in both models [21, 22]. We generated paired single-cell RNA- and T  
151 cell receptor (TCR)-sequencing (scRNA/TCR-seq) and single-cell assay for transposase  
152 accessible chromatin with sequencing (scATAC-seq) data from LCMV glycoprotein 33-  
153 41 tetramer positive (gp33<sup>+</sup>) and tetramer negative (gp33<sup>-</sup>) splenic CD8<sup>+</sup> T cells at two  
154 timepoints (Day 8 and Day 21 post-infection) for both infection models (**Figure 1A-C**).  
155 At Day 21 (D21) of C13 infection, we also generated scRNA/TCR-seq of gp33<sup>+</sup> and  
156 gp33<sup>-</sup> populations from two additional organs with known differences in viral antigen  
157 load (lung and liver; **Figure 1B and Figure S1A**) [23, 24]. Finally, we sorted D21 C13  
158 splenic T cells using previously defined surface markers that identify Tex<sup>prog</sup> (SLAMF6<sup>+</sup>),  
159 Tex<sup>int</sup> (CX3CR1<sup>+</sup>), and Tex<sup>term</sup> (PD-1<sup>+</sup>, SLAMF6<sup>-</sup> and CX3CR1<sup>-</sup>) phenotypes and  
160 performed scRNA/TCR- and scATAC-seq (**Figure S1B**) [7-9, 13]. In total, we obtained  
161 96,750 scRNA-seq profiles that passed quality control filters based on the detected  
162 gene count (>200 genes/cell), mitochondrial content (<5% mitochondrial RNA  
163 content/cell), and predicted doublets (**Figure 1D and S1C, Methods**). Of scRNA-seq  
164 profiles passing quality control filters, we detected TCR alpha and beta sequences in  
165 88,696 T cells (91.7%) and 5,197 expanded T cell clones (clones >1 cell; **Figure 1D**).  
166 We obtained 62,731 scATAC-seq profiles that passed quality control filters based on the  
167 unique ATAC-seq fragment count (>1,000 fragments/cell), median read enrichment at  
168 transcription start sites (>4 TSS score), and predicted doublets (**Figure 1E, S1D and**  
169 **S1E, Methods**).

170 After scRNA-seq quality control filtering, we performed uniform manifold  
171 approximation and projection (UMAP), followed by dimensionality reduction and  
172 identified 11 scRNA-seq clusters, which were annotated based on differentially  
173 expressed genes (DEGs; log<sub>2</sub> FC >0.25, Bonferroni adjusted p-value <0.01). In Arm  
174 infection, we observed expected T cell phenotypes, including naïve T cells (T<sup>naive</sup>; *Ccr7*,  
175 *Sell*, and *Lef1*, 248 DEGs), effector T cells (T<sup>eff</sup>; *Klrg1* and *Ly6c2*, 143 DEGs), effector  
176 memory T cells (T<sup>em</sup>; *Klrb1c*, *Klrd1* and *S1pr1*, 193 DEGs), and memory T cells (T<sup>mem</sup>;  
177 *Il7r*, *Arl4c* and *Il18r1*, 35 DEGs; **Figure 1F, Table S1**). In C13 infection, we observed  
178 Tex<sup>prog</sup> (*Tcf7*, *Slamf6* and *Id3*, 117 DEGs), Tex<sup>int</sup> (*Lgals3*, *S100a4* and *Mki67*, 113  
179 DEGs), and Tex<sup>term</sup> (*Gzma*, *Bcl2*, *Cd101* and *Entpd1*; n=138), as expected (**Figure 1D**  
180 **and 1F**). In addition, we also observed early effector exhausted cells (Tex<sup>eff</sup>; *Xcl1*,  
181 *Top2a* and *Mif*, 1,059 DEGs; a predominant population on D8 of C13 infection), killer  
182 cell lectin-like receptor (KLR)-expressing exhausted cells (Tex<sup>KLR</sup>; *S1pr5*, *Cx3cr1*, *Klrc1*  
183 and *Zeb2*, 260 DEGs; emerging specifically late in C13), lung terminal exhausted cells  
184 primarily detected in the lung (Tex<sup>lung</sup>; *Lag3*, *Ifng*, *Ccl3* and *Ccl4*, 247 DEGs), and

185 interferon signature gene (ISG) exhausted T cells ( $\text{Tex}^{\text{ISG}}$ ; *Isg15*, *Ifit1*, *Ifit3* and *Isg20*,  
186 273 DEGs; **Figure 1D and F**).

187 We observed 8 analogous T cell populations in the scATAC-seq data and  
188 annotated each cluster based on differential chromatin accessibility at marker gene loci  
189 identified in scRNA-seq clusters (i.e., Gene Score,  $\log_2 \text{FC} > 0.5$ ,  $\text{FDR} < 0.01$ ; **Figure**  
190 **1G**) and integration with scRNA-seq data (**Figure S1F, Methods**). Since our primary  
191 goal was to analyze  $\text{Tex}$  differentiation, we did not perform scATAC-seq at D21 in Arm  
192 infection, or in lung or liver T cells in CI13 infection; thus, scATAC-seq clusters did not  
193 include  $\text{T}^{\text{em}}$ ,  $\text{T}^{\text{mem}}$ , or  $\text{Tex}^{\text{lung}}$  subsets. However, scATAC-seq clusters did reveal  
194 additional heterogeneity in the early effector subsets, including three early  
195 activated/effector populations from the D8 time point in the two infection models. These  
196 subsets did not co-cluster with D21  $\text{Tex}$  populations, and included two effector  
197 populations ( $\text{T}^{\text{eff}}$  and  $\text{T}^{\text{eff}2}$ ) - mainly derived from the Arm condition - and an early  
198 effector exhausted population from the CI13 condition ( $\text{Tex}^{\text{eff}}$ ; **Figure 1E and G, Table**  
199 **S2**).

200 scATAC-seq profiles were analyzed at the level of: (1) chromatin accessibility of  
201 *cis*-elements (open chromatin regions; OCRs), (2) gene activity scores, computed from  
202 the accessibility of enhancers linked to a single gene promoter based on proximity and  
203 co-accessibility, and (3) transcription factor (TF) activity, computed from the enrichment  
204 of TF binding sites in OCRs or the accessibility of TF binding sites genome-wide in each  
205 single cell [25, 26]. Analysis of *cis*-elements identified cell type-specific OCRs ( $\text{T}^{\text{naive}}$  -  
206 12,444;  $\text{T}^{\text{eff}}$  - 331;  $\text{T}^{\text{eff}2}$  - 4,070; and  $\text{Tex}^{\text{eff}}$  - 1,463;  $\text{Tex}^{\text{prog}}$  - 4,532;  $\text{Tex}^{\text{int}}$  - 448;  $\text{Tex}^{\text{term}}$  -  
207 2,264;  $\text{Tex}^{\text{KLR}}$  - 668; **Figure 1H, Table S2**), and accessibility was correlated with gene  
208 expression at marker gene loci that define  $\text{Tex}$  subsets, including *Tcf7* ( $\text{T}^{\text{naive}}$ ,  $\text{Tex}^{\text{prog}}$ ),  
209 *Pdcd1* ( $\text{Tex}^{\text{prog}}$ ,  $\text{Tex}^{\text{int}}$ , and  $\text{Tex}^{\text{term}}$ ), and *Tox* ( $\text{Tex}^{\text{prog}}$ ,  $\text{Tex}^{\text{int}}$ , and  $\text{Tex}^{\text{term}}$ ; **Figure 1I,**  
210 **Methods**). TF motif enrichment analysis at cell type-specific OCRs identified TF motifs  
211 enriched in specific T cell subsets. As expected,  $\text{T}^{\text{naive}}$ -specific OCRs were enriched for  
212 the TCF/LEF motifs, which were also enriched in  $\text{Tex}^{\text{prog}}$ , along with other known  $\text{Tex}^{\text{prog}}$   
213 TFs (e.g., BATF, AP-1 and BACH), and two with undescribed functions (HIVEP and  
214 NFkB) [14, 17, 27, 28].  $\text{Tex}^{\text{eff}}$  showed NFAT motif enrichment, while KLF motifs were  
215 specifically enriched in the  $\text{Tex}^{\text{int}}$ ,  $\text{T}^{\text{eff}}$ , and  $\text{Tex}^{\text{KLR}}$  populations. Finally,  $\text{Tex}^{\text{term}}$ -specific  
216 OCRs exhibited strong enrichment for NR4A, RUNX and NFAT TF motifs (**Figure S1G,**  
217 **Table S3**) [29-32]. Together, these datasets describe the landscape of transcriptional  
218 and epigenetic CD8<sup>+</sup> T cell states, including previously unidentified  $\text{Tex}$  populations,  
219 that emerge in response to chronic LCMV infection.

220

### 221 **CX3CR1<sup>+</sup> exhausted T cells comprise three distinct $\text{Tex}$ subsets.**

222 We first examined heterogeneity within CX3CR1<sup>+</sup>  $\text{Tex}$  cells, since these cells  
223 have recently been described as a highly proliferative and multi-functional intermediate  
224 cell state between  $\text{Tex}^{\text{prog}}$  and  $\text{Tex}^{\text{term}}$  [8, 9, 13]. scRNA-seq of sorted CX3CR1<sup>+</sup> T cells  
225 from D21 of CI13 infection revealed substantial heterogeneity that primarily spanned  
226 three distinct phenotypes ( $\text{Tex}^{\text{eff}}$ , abundant at D8, and  $\text{Tex}^{\text{int}}$  and  $\text{Tex}^{\text{KLR}}$ , abundant at  
227 D21; **Figure 2A, Figure S2A**). To better understand the temporal gene expression  
228 programs of  $\text{Tex}^{\text{eff}}$  and  $\text{Tex}^{\text{int}}$ , we performed DEG analysis ( $\log_2 \text{FC} > 0.25$ , Bonferroni  
229 adjusted p-value  $< 0.01$ ) and identified 382 genes with significantly higher expression in  
230  $\text{Tex}^{\text{eff}}$  (e.g., *Rplp0*, *Rpsa*, *Gapdh* and *Cenpa*) and 286 genes with significantly higher

231 expression in  $\text{Tex}^{\text{int}}$  (e.g., *Ccl5*, *Cd3e*, *Lcp2* and *Nfatc1*; **Figure S2A, Table S4**).  
232 Ingenuity pathway analysis linked protein translation (EIF2 Signaling), cell cycle  
233 (Kinetochore Metaphase Signaling Pathway), and glycolysis (Glycolysis I.) to the D8  
234 population, indicative of a highly proliferative, activated T cell subset. In contrast, the  
235 transcriptional program of  $\text{Tex}^{\text{int}}$  at D21 was related to TCR stimulation and downstream  
236 signaling (**Figure S2A**). These results suggest that the  $\text{Tex}^{\text{eff}}$  subset possesses higher  
237 cycling and glycolytic activities, while the  $\text{Tex}^{\text{int}}$  subset is more differentiated and  
238 expresses genes related to TCR signaling, which seeds downstream Tex populations.

239 To similarly determine the transcriptional programs that distinguish  $\text{Tex}^{\text{int}}$  cells  
240 from  $\text{Tex}^{\text{KLR}}$  cells, we performed DEG analysis and found 97  $\text{Tex}^{\text{KLR}}$ -biased genes and  
241 340  $\text{Tex}^{\text{int}}$ -biased genes (**Figure 2B, Table S5**). Pathway analysis of  $\text{Tex}^{\text{KLR}}$  and  $\text{Tex}^{\text{int}}$   
242 genes demonstrated the enrichment of cell cycle- and T cell exhaustion-related  
243 biological terms in the  $\text{Tex}^{\text{int}}$  population, while linking T cell activation signaling and T  
244 cell motility-related functions to the  $\text{Tex}^{\text{KLR}}$  subset (**Figure 2B**). Notably, many markers  
245 of terminal effector and effector memory T cells, such as the killer cell lectin-like  
246 receptor (KLR) family members (e.g., *Klrd1*, *Klrk1*, *Klrc1*, *Klre1* and *Klrg1*), the TF,  
247 *Zeb2*, and its target gene, *S1pr5* (a marker of tissue emigrating antigen-experienced T  
248 cells), showed a highly specific expression pattern in the  $\text{Tex}^{\text{KLR}}$  subset [33, 34]. In  
249 contrast,  $\text{Tex}^{\text{int}}$  cells expressed canonical exhaustion markers, such as *Tox*, *Tox2*,  
250 *Ctla4*, *Pdcd1*, and *Lag3*, along with cell cycle genes (e.g., *Cdk6*), and TCR signaling  
251 genes (e.g., *Coro1a*, *Tapbp1* and *Sh2d2a*; **Figure 2B**) [35-37]. We focused on the  
252  $\text{Tex}^{\text{KLR}}$  subset and assessed the expression of the gene signature of terminal effector  
253 memory T cells (T- $\text{T}^{\text{em}}$ ), a recently described subset of  $\text{T}^{\text{em}}$  identified during acute LCMV  
254 infection, which express effector T cell markers, including KLRs (e.g., *Cx3cr1*, *Zeb2*,  
255 *S1pr5*, and *Klre1*) [38]. The T- $\text{T}^{\text{em}}$  gene signature was highly expressed in the  $\text{Tex}^{\text{KLR}}$   
256 cells and was also observed at the single cell level by scoring the cells based on the  
257 expression of this gene panel; thus, cells we term 'KLR-expressing Tex' ( $\text{Tex}^{\text{KLR}}$ ) may  
258 represent a parallel differentiation path to T- $\text{T}^{\text{em}}$  with strong effector function and the  
259 potential for memory formation (**Figure 2C-E**) [13]. In summary, the CX3CR1<sup>+</sup> T cell  
260 pool contains additional T cell subsets with distinct functionalities and dynamics during  
261 the course of chronic infection, which may explain the multitude of effector- and  
262 exhaustion-related functions that have previously been linked to this population [8, 9,  
263 13].

264

### 265 **Tex acquire organ-specific terminal exhaustion signatures.**

266 Next, we asked whether chronic viral infection leads to similar T cell states in  
267 different tissues. We re-clustered scRNA-seq profiles from animal-matched gp33<sup>+</sup> and  
268 gp33<sup>-</sup> CD8<sup>+</sup> T cell fractions from the spleen, lung, and liver at D21 of CI13 infection. We  
269 annotated CD8<sup>+</sup> T cell subsets based on the previously-defined markers and examined  
270 their distribution across organs (**Figure 2F**). Relative to splenic T cells, cells in the lung  
271 exhibited an alternative terminal exhausted phenotype ( $\text{Tex}^{\text{lung}}$ ) and a reduced  $\text{Tex}^{\text{prog}}$   
272 population, while the proportions of  $\text{Tex}^{\text{KLR}}$  and  $\text{Tex}^{\text{int}}$  populations were similar to the  
273 spleen (**Figure 2F and G**). Strikingly, T cells in the liver almost exclusively adopted the  
274  $\text{Tex}^{\text{term}}$  phenotype, with dramatically reduced numbers of other Tex phenotypes, as  
275 previously described (6.1% of the total; **Figure 2F and G**) [60]. We further examined  
276 tissue-specific differences in the exhaustion signature by pairwise differential gene

277 expression analyses ( $\log_2$  FC > 0.25, Bonferroni adjusted p-value < 0.01). Compared to  
278 splenic  $\text{Tex}^{\text{term}}$  cells, liver-derived  $\text{Tex}^{\text{term}}$  cells possessed a strong tissue-resident  
279 memory T cell signature, including the expression of *Cd69*, *Cxcr6*, *Ccl3* and *Ccl4*, and  
280 heightened mTOR and glycolytic activity (**Figure 2H, Table S6**). Similarly, lung-derived  
281  $\text{Tex}^{\text{term}}$  cells also exhibited typical markers of lung-resident memory T cells, including  
282 *Cxcr6*, *Cd44* and several integrin genes (*Itga4*, *Itgad*, *Itgab7* and *Itgab1*; **Figure 2H,**  
283 **Table S7**). Furthermore, both liver- and lung-derived  $\text{Tex}^{\text{term}}$  cells expressed higher  
284 levels of pro-survival genes than splenic  $\text{Tex}^{\text{term}}$  cells, including, *Bcl2*, *Bcl2a1b*, and  
285 *Bcl2a1d* (**Figure 2H, Table S8**). These results suggest that  $\text{Tex}^{\text{term}}$  cells can obtain  
286 tissue residency signatures and persist in tissues in the setting of chronic antigen.

287 Despite tissue specific differences in gene expression of  $\text{Tex}^{\text{term}}$ , we observed a  
288 common  $\text{Tex}^{\text{term}}$  gene signature across all organs. This signature (n=35 genes)  
289 contained previously described exhaustion-related genes, such as immune checkpoint  
290 inhibitory receptors, *Pdcd1*, *Lag3*, and *Tigit*, and the key TF, *Tox*, which imprints the  
291 transcriptional and epigenetic signature of T cell exhaustion (**Figure 2I**). Finally, we  
292 constructed an exhaustion gene signature based on previously defined CXCR5<sup>+</sup> and  
293 CXCR5<sup>-</sup> T cells subsets and scored the severity of exhaustion among  $\text{Tex}^{\text{term}}$  cells from  
294 each organ [6]. We observed that liver-derived  $\text{Tex}^{\text{term}}$  cells scored the highest for the  
295 exhaustion signature, followed by splenic and lung-derived  $\text{Tex}^{\text{term}}$  cells (**Figure 2J**). We  
296 also scored  $\text{Tex}^{\text{term}}$  and  $\text{Tex}^{\text{int}}$  cells based on cell cycle activity, which ranked liver-  
297 derived cells as the least proliferative, followed by the lung and spleen, inversely  
298 correlating with the severity of exhaustion (**Figure S2B**). These results demonstrate that  
299 T cell exhaustion develops across multiple organs with a common gene expression  
300 signature but microenvironment-specific effects; namely, exhaustion is most  
301 pronounced in the liver niche, which is perhaps driven by higher antigen burden or  
302 anatomical differences [39].

303

### 304 **Regulatory programs underlying $\text{Tex}$ subsets and early fate commitment to the** 305 **$\text{Tex}$ lineage.**

306 The chromatin state of  $\text{Tex}$  subsets is dynamically regulated and represents a  
307 major point of epigenetic imprinting [20] [40]. Two open questions are: (1) the earliest  
308 cell cell stage of  $\text{Tex}$  epigenetic priming, and (2) the temporal regulation of the  $\text{Tex}$   
309 epigenetic program. To address these questions, we focused our analysis on scATAC-  
310 seq data from CI13 infection and analyzed gp33<sup>+</sup> and gp33<sup>-</sup> T cells from two time points  
311 (D8 and D21) that encompassed previously-defined and our newly-defined  $\text{Tex}$  subsets  
312 (**Figure 3A and B**). Next, we defined differential OCRs for each  $\text{Tex}$  subset, including  
313  $\text{Tex}^{\text{eff}}$  (3,567 OCRs),  $\text{Tex}^{\text{prog}}$  (4,818 OCRs),  $\text{Tex}^{\text{int}}$  (235 OCRs),  $\text{Tex}^{\text{KLR}}$  (1,223 OCRs),  
314 and  $\text{Tex}^{\text{term}}$  (1,594 OCRs; **Figure 3C**). CI13-focused scATAC-seq analysis identified a  
315 second, more effector-like  $\text{Tex}^{\text{eff2}}$  population at D8 that exhibited higher accessibility at  
316 *Klrc1* and *Gzmm* genes (2,296 OCRs). In addition to the previously described  $\text{Tex}$   
317 subset-specific motif enrichments (**Figure S1G**), the CI13-focused analysis allowed us  
318 to observe potential relatedness of the subsets based on their chromatin features and  
319 enriched TF motifs (**Figure 3C**). Namely, we observed that: (1) the open chromatin  
320 landscape of  $\text{Tex}^{\text{prog}}$  and  $\text{Tex}^{\text{eff}}$  partially overlap, indicative of developmental  
321 relatedness, and (2) the  $\text{Tex}^{\text{int}}$  subset exhibits an intermediate chromatin state between  
322 the  $\text{Tex}^{\text{term}}$  and  $\text{Tex}^{\text{KLR}}$  subsets, with very few unique OCRs, suggesting that this cell

323 state is an intermediate cell stage and a potential bifurcation point of Tex differentiation,  
324 supported by our observation of Tex<sup>int</sup> at D8 and the emergence of Tex<sup>term</sup> and Tex<sup>KLR</sup>  
325 by D21 (**Figure 1B**).

326 Next, we focused on the early programming of exhaustion by comparing D8  
327 scATAC-seq phenotypes in Arm and CI13 infection (**Figure S3A**). As previously  
328 described, memory precursor cells (T<sup>mp</sup>) are present at D8 in Arm infection and cluster  
329 with an early Tex<sup>prog</sup> population present at D8 in CI13 infection that expresses *Tox* and  
330 *Tcf7* (herein referred to as precursor exhausted - Tex<sup>prec</sup>), but these subsets were  
331 relatively infrequent compared to the effector populations in both infection models (1.4%  
332 of D8 cells in Arm infection, 3.3% of cells at D8 in CI13 infection) [14, 41]. We first  
333 compared the gene expression and chromatin state programs of T<sup>mp</sup> and Tex<sup>prec</sup>  
334 subsets, which revealed strong exhaustion- and interferon-induced programs in Tex<sup>prec</sup>,  
335 as expected (**Figure S3B, S3C and S3D, Table S9**). Second, we analyzed DEGs of  
336 effector cells in Arm and CI13 infection, which revealed a strong Tex signature in the  
337 Tex<sup>eff</sup> subset compared to T<sup>eff</sup>; T<sup>eff</sup> showed a *bona fide* effector program (e.g., *Gzma*,  
338 *Klrd1*, *Ccr2*, and *Cx3cr1*, 371 DEGs), while Tex<sup>eff</sup> expressed high levels of exhaustion  
339 marker genes (e.g., *Tox*, *Lag3*, *Pdcd1*, *Havcr2*, *Ctla4*, and *Tigit*, 618 DEGs; **Figure 3D**).  
340 These observations were also supported by the chromatin state programs of these  
341 subsets (T<sup>eff</sup> - 7,066 OCRs vs. Tex<sup>eff</sup> - 5,211 OCRs) that were associated with T<sup>eff</sup>-  
342 specific (ETS and RUNX) and Tex<sup>eff</sup>-specific (NFAT and BATF) TF motifs (**Figure 3D**,  
343 **Table S10**). Altogether, these results support recent studies demonstrating the  
344 formation of Tex<sup>prec</sup> early during chronic infection that exhibit molecular signatures of  
345 exhaustion, distinct from T<sup>mp</sup> [14, 41]. However, we find that the exhaustion program,  
346 including *Tox* expression, is present in an earlier Tex<sup>eff</sup> stage and driven by NFAT and  
347 BATF, which may prime the chromatin state of TCF1<sup>-</sup> cells for exhaustion, supporting a  
348 model in which an initial wave of effector cells undergoes contraction and gives rise to  
349 Tex<sup>prog</sup> cells that seed additional Tex subsets.

350 Although Tex differentiation downstream of Tex<sup>prog</sup> is currently thought to follow a  
351 linear path, our identification of a Tex<sup>KLR</sup> subset, which emerges late in infection  
352 alongside Tex<sup>term</sup>, suggests that the Tex<sup>int</sup> population may represent a potential  
353 bifurcation point between Tex<sup>KLR</sup> and Tex<sup>term</sup> phenotypes (**Figure 1D, 2A and 3A**) [3].  
354 We compared scATAC-seq profiles of Tex<sup>KLR</sup> and Tex<sup>term</sup> subsets to Tex<sup>int</sup> cells and  
355 identified 405 Tex<sup>term</sup>-specific, 364 Tex<sup>KLR</sup>-specific OCRs, and only 4 common OCRs,  
356 suggesting that these two cell states are epigenetically divergent (**Figure 3E**).  
357 Accordingly, TF motif enrichment analysis showed increased accessibility of NFAT, IRF,  
358 STAT, and NR4A TF motifs in Tex<sup>term</sup> and increased accessibility of RUNX, MGA, KLF,  
359 TBET/EOMES and ETS TF motifs in Tex<sup>KLR</sup> (**Figure 3F**). Differential gene expression  
360 analysis (log<sub>2</sub> FC > 0.25, Bonferroni adjusted p-value < 0.01) identified 97 Tex<sup>KLR</sup>-  
361 biased genes (e.g., *Klrg1*, *Arl4c* and *Zeb2*) and 340 Tex<sup>term</sup>-biased genes (e.g., *Tox*,  
362 *Tox2*, *Lag3* and *Pdcd1*; **Figure S3E, Table S11**). These results indicate that Tex<sup>KLR</sup> and  
363 Tex<sup>term</sup> cells exhibit distinct chromatin and gene expression programs, supporting the  
364 idea that these phenotypes represent late stages of a divergent differentiation trajectory  
365 of exhaustion that bifurcates at the Tex<sup>int</sup> stage.

366 Finally, we analyzed 15,809 variable OCRs for TF motif enrichments across  
367 three differentiation trajectories nominated by longitudinal timepoint data and/or  
368 chromatin state similarities: (1) Tex<sup>prog</sup> trajectory (Tex<sup>eff</sup> → Tex<sup>prec</sup> → Tex<sup>prog</sup>), (2)



369  $\text{Tex}^{\text{term}}$  trajectory ( $\text{Tex}^{\text{prog}} \rightarrow \text{Tex}^{\text{int}} \rightarrow \text{Tex}^{\text{term}}$ ), and (3)  $\text{Tex}^{\text{KLR}}$  trajectory ( $\text{Tex}^{\text{prog}} \rightarrow \text{Tex}^{\text{int}}$   
370  $\rightarrow \text{Tex}^{\text{KLR}}$ ; **Figure 3G**). The  $\text{Tex}^{\text{prog}}$  trajectory showed a gradual loss of HOMEBOX TF  
371 motifs and enrichment of BATF, AP-1, BACH, NFkB, TCF and CTCF motifs. In contrast,  
372 in both  $\text{Tex}^{\text{term}}$  and  $\text{Tex}^{\text{KLR}}$  trajectories, we observed a gradual loss of  $\text{Tex}^{\text{prog}}$  specific TF  
373 motifs (e.g., TCF, BACH and BATF) upon entry to the  $\text{Tex}^{\text{int}}$  cell state. Differentiation  
374 trajectories that bifurcated from the  $\text{Tex}^{\text{int}}$  state showed the enrichment of specific TF  
375 motifs that might bind TFs which can guide the differentiation program of  $\text{Tex}^{\text{KLR}}$  (e.g.,  
376 ZEB, ID, IRF, KLF, ETS, RFX, HIVEP and RUNX) and  $\text{Tex}^{\text{term}}$  (e.g., RUNX and NR4A;  
377 **Figure 3G**). Finally, we studied the accessibility of the *Tox* locus, encoding the TF that  
378 is critical for *Tex* differentiation [4, 15, 16, 18, 19]. Accessibility of the *Tox* locus  
379 gradually increased as cells transitioned from  $\text{Tex}^{\text{eff}}$  to  $\text{Tex}^{\text{prog}}$ , while it gradually  
380 decreased as they transitioned to  $\text{Tex}^{\text{KLR}}$ . The  $\text{Tex}^{\text{term}}$  trajectory demonstrated a  
381 decrease in *Tox* accessibility during the  $\text{Tex}^{\text{prog}}$  to  $\text{Tex}^{\text{int}}$  transition and a subsequent  
382 increase in the  $\text{Tex}^{\text{term}}$  state (**Figure 3G**). We annotated differentially accessible OCRs  
383 (compared to  $\text{T}^{\text{naive}}$  cells) in a +/- 250kb window around the transcription start site of *Tox*  
384 and identified 88 OCRs. Of these OCRs, 16 and 8 were differentially accessible in  
385  $\text{Tex}^{\text{eff}}$  or  $\text{Tex}^{\text{prog}}$ , respectively, which was also supported by high *Tox* expression in  
386 these subsets (relative to  $\text{T}^{\text{naive}}$ ), indicating that TOX executes the molecular  
387 programming of *Tex* differentiation in these subsets (**Figure S3F, Table S12**). These  
388 results identify the  $\text{Tex}^{\text{eff}}$  population as a novel point of the molecular programming of  
389 exhaustion and nominate the  $\text{Tex}^{\text{int}}$  population as a potential bifurcation point of *Tex* cell  
390 differentiation states.

391

### 392 **Clone tracing reveals divergent *Tex* differentiation trajectories during chronic** 393 **viral infection.**

394 We next leveraged paired scRNA/TCR-seq data to analyze clonal trajectories of  
395 T cells in Arm and CI13 (D8 and D21) infection (**Figure 4A**). We identified 212 and 280  
396 expanded T cell clones (> 1 cell) at D8 and D21 of Arm infection, respectively, and 134  
397 and 338 expanded clones at D8 and D21 of CI13 infection, respectively. As expected, at  
398 D8 of Arm infection, clonally expanded T cells were largely restricted to the  $\text{T}^{\text{eff}}$  pool,  
399 while at D21, clonally expanded T cells exhibited a balanced distribution between  $\text{T}^{\text{em}}$   
400 and  $\text{T}^{\text{mem}}$  phenotypes (**Figure 4B and Figure S4A**). In contrast, clonal expansion at D8  
401 in CI13 infection occurred almost exclusively in  $\text{Tex}^{\text{eff}}$  (**Figure 4C**). Importantly, the  
402  $\text{Tex}^{\text{prog}}$  population did not show strong clonal expansion at this early time point, further  
403 supporting our prior observation that cells in this population are infrequent at D8 and  
404 subsequently expand by transition from  $\text{Tex}^{\text{eff}}$  or self-renewal from cells not  
405 significantly present at D8 (**Figure 3**). At D21 in CI13 infection, we observed expanded  
406 clones across multiple *Tex* phenotypes, including  $\text{Tex}^{\text{prog}}$ ,  $\text{Tex}^{\text{int}}$ ,  $\text{Tex}^{\text{term}}$ , and  $\text{Tex}^{\text{KLR}}$   
407 (**Figure 4C and Figure S4B**).

408 To further investigate *Tex* clonal differentiation trajectories, we visualized the  
409 distribution of cellular phenotypes for the top 10 expanded clones at D8 and D21 in  
410 each infection. At D8, cells of the top expanded clones from the Arm condition almost  
411 exclusively acquired the  $\text{T}^{\text{eff}}$  phenotype, with clone sizes ranging from 77-321 cells  
412 (mean 153 cells, 3.8% of 4,030 total cells). At D21, top expanded clones acquired both  
413  $\text{T}^{\text{em}}$  and  $\text{T}^{\text{mem}}$  phenotypes, with clone sizes ranging from 145-366 (mean 246 cells, 3.5%  
414 of 7,033 total cells; **Figure 4D and Figure S4A**). In contrast, the top expanded clones in

415 CI13 infection acquired the  $\text{Tex}^{\text{eff}}$  phenotype at D8, with clone sizes ranging from 26-95  
416 cells (mean 49 cells, 3.5% of 1,414 total cells). Notably, expanded clones only  
417 contained small numbers of cells with the  $\text{Tex}^{\text{prog}}$  phenotype at this time point (**Figure**  
418 **4D**). Analysis of D21 of CI13 infection identified substantially larger clone sizes, ranging  
419 from 146-2,026 cells (mean 525 cells, 7.0% of 7,489 total cells; **Figure 4D**). Strikingly,  
420 these large clones contained cells with multiple Tex phenotypes ( $\text{Tex}^{\text{prog}}$ ,  $\text{Tex}^{\text{int}}$ ,  $\text{Tex}^{\text{KLR}}$ ,  
421 and  $\text{Tex}^{\text{term}}$ ), although the frequency of each phenotype varied considerably between  
422 individual clones. Namely, individual clones either preferentially acquired the  $\text{Tex}^{\text{term}}$  or  
423 the  $\text{Tex}^{\text{KLR}}$  phenotypes, or developed into both phenotypes (**Figure 4D and Figure**  
424 **S4B**). This observation prompted us to perform a more detailed analysis of the  
425 phenotypic distribution of all large clones (> 3 cells detected) of the top 7 most dominant  
426 clonal phenotype combinations, which revealed three main clonal differentiation  
427 patterns (referred to as clone behaviors): 1)  $\text{Tex}^{\text{term}}$ -biased clones, consisting of cells  
428 that predominantly acquired the  $\text{Tex}^{\text{term}}$  and not  $\text{Tex}^{\text{KLR}}$  phenotype (45% of clones), 2)  
429  $\text{Tex}^{\text{KLR}}$ -biased clones, consisting of T cells that predominantly acquired the  $\text{Tex}^{\text{KLR}}$   
430 phenotype (18% of clones), and 3) divergent clones, consisting of cells that acquired  
431  $\text{Tex}^{\text{term}}$  and  $\text{Tex}^{\text{KLR}}$  phenotypes (37% of clones; **Figure 4E**). Divergent clones were the  
432 most clonally expanded and ranged from 7-2,026 cells (mean 197 cells) per clone, while  
433  $\text{Tex}^{\text{term}}$ -biased clones ranged from 4-111 cells (mean 19 cells) per clone. Interestingly,  
434  $\text{Tex}^{\text{KLR}}$ -biased clones were relatively small and ranged from 4-21 cells (mean 8 cells)  
435 per clone (**Figure 4E-G**). We also noted several larger clones (4-233 cells, mean 53  
436 cells) that skewed heavily to the  $\text{Tex}^{\text{KLR}}$  phenotype (>50% of cells acquire the  $\text{Tex}^{\text{KLR}}$   
437 phenotype), but had a small percentage of  $\text{Tex}^{\text{term}}$  cells (**Figure S4C**). To account for  
438 sampling biases where not all relevant phenotypes may be observed for small clones,  
439 we randomized T cell phenotype and TCR clone assignment to generate a null  
440 distribution of clone patterns if each clone randomly acquired all observed phenotypes  
441 (**Methods**). This analysis revealed a striking enrichment of  $\text{Tex}^{\text{KLR}}$ - and  $\text{Tex}^{\text{term}}$ -biased  
442 clone behavior over random chance, whereas the divergent clonal differentiation pattern  
443 was twice as likely to be detected by random chance than observed in our data,  
444 suggesting that the observed biases in clone behavior are not simply the result of  
445 sampling bias (**Figure S4D**). Altogether, these results reveal novel clonal Tex  
446 differentiation trajectories during chronic infection (**Figure 4H**).

#### 447 448 **Antigen-specific expanded Tex clones and phenotypes are shared across tissues.**

449 Next, we asked if clonal differentiation patterns are intrinsically programmed,  
450 perhaps by the TCR, or stochastic. We first determined whether expanded Tex clones  
451 could be found across different tissues by analyzing antigen-specific  $\text{gp33}^+$  and  $\text{gp33}^-$   
452  $\text{CD8}^+$  T cells across organs (animal-matched) in CI13 at D21 (**Figure 5A**). In spleen-,  
453 liver-, and lung-derived scRNA/TCR-seq datasets, we detected expanded T cell clones  
454 across all three tissues, and as expected, the  $\text{gp33}^+$  and  $\text{gp33}^-$  fractions showed  
455 minimal TCR overlap, validating our sorting strategy (**Figure 5B and Figure S5A**).  
456 Importantly, there was significant TCR sharing across the different organs for both  
457  $\text{gp33}^+$  and  $\text{gp33}^-$  fractions (**Figure S5A**). We identified expanded organ-shared T cell  
458 clones that had at least 5 T cells, which consisted of at least 1 cell from each organ.  
459 This analysis identified 100 shared T cell clones among all organs, 37 clones shared  
460 between the lung and spleen, and 22 clones specific to the spleen (**Figure 5C and D**).

461 We examined the degree of expansion of TCR clones that were detected across organs  
462 and observed a strong correlation in clone frequency in each pairwise organ  
463 comparison (spleen:liver -  $R=0.66$ ; spleen:lung -  $R=0.65$ ; liver:lung -  $R=0.76$ , **Figure**  
464 **5C**).

465 Next, we examined the distribution of phenotypes for clones shared across  
466 organs with different differentiation trajectories defined by their trajectory in the spleen  
467 (**Figure 5E, F and Figure S5B, C**). First, we focused on comparisons between the  
468 spleen and lung, since they exhibited similar heterogeneity in Tex phenotypes.  
469 Strikingly, differentiation trajectories were highly conserved between the two tissues.  
470 Divergent clones in the spleen also maintained Tex<sup>term</sup> and Tex<sup>KLR</sup> phenotypes in the  
471 lung (although instead exhibiting the aforementioned terminal Tex<sup>lung</sup> phenotype; 35/48  
472 divergent clones detected in both organs, **Figure 5E, F, Figure S5B, C**). Similarly, the  
473 majority of splenic Tex<sup>KLR</sup>-biased clones remained Tex<sup>KLR</sup>-biased in the lung (4/7 clones  
474 detected in both organs) and the majority of splenic Tex<sup>term</sup>-biased clones remained  
475 Tex<sup>term</sup>-biased in the lung (11/14 clones detected in both organs; **Figure 5E and Figure**  
476 **S5C**). In particular, we did not observe appreciable interconversion between Tex<sup>KLR</sup>-  
477 and Tex<sup>term</sup>-biased clones between these two organs (0/19 shared clones). Accordingly,  
478 quantification of the Tex<sup>KLR</sup> and Tex<sup>term</sup> frequencies within individual clones showed a  
479 high concordance across organs (Tex<sup>KLR</sup> spleen:lung -  $R=0.96$ , Tex<sup>term</sup> spleen:lung -  
480  $R=0.75$ ; **Figure 5G**). Altogether, these results demonstrate that clonally expanded Tex  
481 clones are shared across organs and that clonal differentiation behavior is primarily an  
482 intrinsically programmed, rather than stochastic, process.

483

#### 484 **Depletion of Tex<sup>KLR</sup> clones in the liver microenvironment.**

485 We next analyzed clonal behavior in the liver, which showed an enrichment of  
486 Tex<sup>term</sup> compared to other organs (94% Tex<sup>term</sup>), perhaps driven by high antigen burden  
487 [39]. Thus, in contrast to the lung, we expected an enrichment in clonal Tex<sup>term</sup>  
488 frequency; however, this could either be driven by: (1) depletion of Tex<sup>KLR</sup> in the liver  
489 microenvironment, or (2) interconversion of Tex<sup>KLR</sup>-biased clones to Tex<sup>term</sup>-biased  
490 clones. To distinguish between these two possibilities, we first analyzed the Tex<sup>KLR</sup>-  
491 biased clones from the spleen and found that only one of these clones was present in  
492 the liver (1/7 shared clones), suggesting that Tex<sup>KLR</sup>-biased clones are depleted in the  
493 liver niche. Similarly, although divergent clones were largely detectable in the liver  
494 (52/58 clones shared between spleen and liver), we again observed a depletion of  
495 Tex<sup>KLR</sup> cells, resulting in Tex<sup>term</sup>-biased behavior in the majority of the cases (32/52  
496 shared clones). In contrast, the majority of Tex<sup>term</sup>-biased clones remained Tex<sup>term</sup>-  
497 biased in the liver, although they were heavily skewed towards the Tex<sup>term</sup> phenotype,  
498 with relative loss of Tex<sup>prog</sup> and Tex<sup>int</sup> phenotypes (9/9 clones, **Figure 5E, F and Figure**  
499 **S5C**). Importantly, Tex<sup>term</sup>-biased clones did not adopt a Tex<sup>KLR</sup> phenotype.  
500 Quantification of frequencies of Tex<sup>KLR</sup> and Tex<sup>term</sup> phenotypes of shared clones in the  
501 spleen and liver confirmed the depletion of Tex<sup>KLR</sup> cells in the liver and a skewing of  
502 Tex<sup>term</sup>-biased clones to the Tex<sup>term</sup> fate (**Figure 5G and H**). Altogether, these results  
503 demonstrate that Tex clones entering the liver exhibit changes in clonal behavior due to  
504 the loss of Tex<sup>KLR</sup>, suggesting that Tex<sup>KLR</sup> are not able to persist in high antigen  
505 environments, perhaps due to activation-induced cell death.

506

507 **TCR affinity can program Tex clone behavior and phenotypic fate commitment.**

508 The difference in expansion levels between Tex<sup>term</sup>-biased clones and Tex<sup>KLR</sup>-  
509 biased clones led us to examine whether Tex differentiation trajectories were driven by  
510 differences in TCR affinity. We used tetramer staining as a proxy for TCR affinity  
511 against the immunodominant LCMV epitope, gp33, and sorted gp33<sup>-</sup> (n=8,914), gp33-  
512 intermediate (gp33<sup>int</sup>; n=5,875), and gp33-high (gp33<sup>high</sup>; n=8,194) CD8<sup>+</sup> T cells from the  
513 spleen of C113-infected mice at D21 and performed scRNA/TCR-seq (**Figure 6A and**  
514 **Figure S6A**). Analysis of TCR sequences identified 313 TCRs in gp33<sup>high</sup> cells, 1,576  
515 TCRs in gp33<sup>int</sup> cells, and 3,803 TCRs in gp33<sup>-</sup> cells (**Figure S6B**). The TCR repertoire  
516 showed a relatively small overlap between gp33<sup>high</sup> and gp33<sup>-</sup> cells (13 shared TCRs),  
517 compared to the overlap between gp33<sup>high</sup> and gp33<sup>int</sup> cells (158 shared TCRs), or  
518 gp33<sup>int</sup> and gp33<sup>-</sup> cells (306 shared TCRs), and quantification of TCR repertoire  
519 similarity using the Morisita overlap index demonstrated that gp33<sup>int</sup> sorting captured a  
520 distinct TCR repertoire compared to gp33<sup>high</sup> and gp33<sup>-</sup> fractions (**Figure 6B and Figure**  
521 **S6B**).

522 Next, we evaluated the clone size distribution of the sorted populations, which  
523 revealed an increase in the percentage of large clones (clones with 5-200 or >200 cells)  
524 as a function of higher tetramer fluorescence, with an accompanying decrease in clonal  
525 diversity (**Figure 6C**). To link unique TCRs to each gp33-tetramer fraction, we  
526 compared the overlap of clones between gp33 fractions and identified 592 unique gp33<sup>-</sup>  
527 clones, 114 unique gp33<sup>int</sup> clones, and 88 unique gp33<sup>high</sup> clones (**Figure 6D**).  
528 Importantly, the distribution of cellular phenotypes for these unique clones showed  
529 considerable phenotypic skewing (**Figure 6E-G**). Namely, gp33<sup>high</sup> cells contained ~3.3  
530 times more cells with Tex<sup>term</sup> and Tex<sup>int</sup> phenotypes, compared to either gp33<sup>-</sup> or gp33<sup>int</sup>  
531 cells (39% Tex<sup>term</sup> and 19% Tex<sup>int</sup> in gp33<sup>high</sup>; 11% Tex<sup>term</sup> and 6.7% Tex<sup>int</sup> in gp33<sup>int</sup>;  
532 11% Tex<sup>term</sup> and 7.0% Tex<sup>int</sup> in gp33<sup>-</sup>), indicating a pronounced phenotypic skewing  
533 towards terminal exhaustion. In contrast, gp33<sup>int</sup> cells exhibited phenotypic skewing  
534 towards the Tex<sup>KLR</sup> phenotype in the population, compared to the gp33<sup>high</sup> and gp33<sup>-</sup>  
535 populations (27% Tex<sup>KLR</sup> in gp33<sup>int</sup>; 7.9% Tex<sup>KLR</sup> in gp33<sup>high</sup>; 13% Tex<sup>KLR</sup> in gp33<sup>-</sup>;  
536 **Figure 6F and G**).

537 To further analyze differentiation trajectories at a clonal level, we visualized the  
538 top 10 unique expanded clones in each gp33-tetramer fraction and assessed their  
539 phenotypic composition. We found that the top clones in the gp33<sup>-</sup> and gp33<sup>high</sup> fractions  
540 were biased towards Tex<sup>term</sup> or divergent phenotypes (10/10 gp33<sup>-</sup> clones and 10/10  
541 gp33<sup>high</sup> clones), while in contrast, the largest clones in the gp33<sup>int</sup> pool exhibited  
542 phenotypic skewing towards the Tex<sup>KLR</sup> phenotype (5/10 gp33<sup>int</sup> clones; **Figure 6H**).  
543 Finally, we analyzed the clone behaviors of the unique clones of the three gp33  
544 fractions in the top 7 most dominant phenotypic patterns that define clone behaviors  
545 (**Figure 6I**). Clones of the gp33<sup>-</sup> fraction exhibited two major clone behaviors, Tex<sup>term</sup>-  
546 biased and Tex<sup>KLR</sup>-biased. Interestingly, clones from the gp33<sup>int</sup> fraction were heavily  
547 enriched for Tex<sup>KLR</sup>-biased differentiation. Finally, expanded clones unique to the  
548 gp33<sup>high</sup> fraction were biased towards Tex<sup>term</sup>-biased and divergent clone behaviors, and  
549 no Tex<sup>KLR</sup>-biased clones were identified (**Figure 6I**). Surprisingly, divergent clone  
550 behaviors were much more common in the unique T cell clones of the gp33<sup>int</sup> and  
551 gp33<sup>high</sup> fractions compared to gp33<sup>-</sup> clones, suggesting that this differentiation path  
552 may be more common among T cell clones that recognize this immunodominant

553 epitope. These results establish that T cell clones distinguished by their affinity for the  
554 immunodominant LCMV epitope have divergent differentiation paths, with lower affinity  
555 TCR clones favoring the development of  $\text{Tex}^{\text{KLR}}$  and higher affinity TCR clones biasing  
556 toward  $\text{Tex}^{\text{term}}$  and divergent behavior.

557

## 558 Discussion

559 Here we report a single-cell multi-omic atlas of T cell exhaustion during chronic  
560 viral infection, which reveals novel  $\text{Tex}$  subsets, identifies multiple differentiation  
561 trajectories of  $\text{Tex}$  clones, and nominates TCR signal strength as a key driver of clonal  
562 behavior. We define an early effector  $\text{Tex}$  differentiation state ( $\text{Tex}^{\text{eff}}$ ), where the  
563 molecular program of exhaustion is initiated, and identify a bifurcation point of  $\text{Tex}$   
564 differentiation ( $\text{Tex}^{\text{int}}$ ), which can give rise to two alternative late-stage  $\text{Tex}$  phenotypes  
565 ( $\text{Tex}^{\text{KLR}}$  and  $\text{Tex}^{\text{term}}$ ) with the potential to balance effector function, immunological  
566 memory, and persistence in high antigen environments. Using the TCR sequence as an  
567 endogenous molecular barcode, we track the fate of individual T cell clones and  
568 establish three main clonal developmental trajectories that give rise to the  
569 heterogeneous  $\text{Tex}$  pool. Surprisingly, we find that clonal differentiation patterns are  
570 shaped by TCR affinity and affect the resulting phenotype and clonal expansion in  
571 different tissue microenvironments. These findings highlight the importance of studying  
572 the polyclonal T cell repertoire at single cell resolution to fully uncover the diversity and  
573 function of T cell states in the immune response.

574 Prior studies have described multiple  $\text{Tex}$  subsets with distinct phenotypic and  
575 functional traits, primarily within the spleen microenvironment during chronic viral  
576 infection [3,10, 11, 42, 43]. In addition to  $\text{Tex}^{\text{term}}$  and  $\text{Tex}^{\text{prog}}$  subsets, transitory  
577 exhausted cells have more recently been characterized as a multi-functional  $\text{CX3CR1}^+$   
578 population with high cytolytic activity, proliferative capacity, and the ability to contribute  
579 to the memory T cell pool [8, 9, 13]. Here we show that this  $\text{CX3CR1}^+$  population  
580 encompasses three T cell subsets with distinct functionalities: 1) an early effector  
581 exhausted subset ( $\text{Tex}^{\text{eff}}$ ) with high proliferative capacity early in infection that is largely  
582 absent at later stages; 2) intermediate exhausted T cells ( $\text{Tex}^{\text{int}}$ ), which maintain a high  
583 proliferation signature and upregulate signaling downstream of TCR stimulation, and 3)  
584 a  $\text{Tex}^{\text{KLR}}$  subset with a strong cytolytic gene expression program, and a terminal effector  
585 memory cell-like signature that has been described in acute infection [38].

586 Given the distinct, stable epigenetic state of  $\text{Tex}$ , which persists after antigen  
587 clearance [20, 40, 44-46], a key question is the stage at which  $\text{Tex}$  epigenetic imprinting  
588 occurs. Previous studies have shown that early  $\text{TCF1}^+$   $\text{Tex}^{\text{prec}}$  cells possess the  
589 epigenetic signature of  $\text{Tex}$  and can seed additional  $\text{Tex}$  subsets [14, 41]. Here, we find  
590 that the  $\text{Tex}$  program is initiated at an earlier stage in  $\text{TCF1}^-$   $\text{Tex}^{\text{eff}}$ . scATAC-seq  
591 analysis suggests that this fate decision is initially driven by NFAT and BATF, which  
592 may prime the chromatin state of  $\text{TCF1}^-$  cells to develop into  $\text{Tex}^{\text{prec}}$ , which  
593 subsequently activate BACH2 and TCF-1 to give rise to  $\text{Tex}^{\text{prog}}$  [14, 17]. This finding  
594 supports a model in which the  $\text{Tex}^{\text{prec}}$  pool, and eventually the  $\text{Tex}^{\text{prog}}$  pool originates  
595 from  $\text{Tex}^{\text{eff}}$ , analogous to memory differentiation from memory precursors or short-lived  
596 effector cells during acute infection.

597 Downstream of the  $\text{Tex}^{\text{prog}}$  population, the differentiation trajectory of  $\text{Tex}$  has  
598 largely been shown to follow a linear cellular path [3]. However, our data suggests that

599 there are two late-stage cell types that result from a divergent differentiation path  
600 ( $\text{Tex}^{\text{KLR}}$  and  $\text{Tex}^{\text{term}}$ ), and that individual clones can follow three differentiation  
601 trajectories resulting in  $\text{Tex}^{\text{term}}$ -biased,  $\text{Tex}^{\text{KLR}}$ -biased, or divergent fates, comprising  
602 both cell types. Furthermore, we find that the differentiation trajectory of  $\text{Tex}$  clones is  
603 intrinsically programmed by TCR affinity and conserved across specific tissue  
604 microenvironments; high-affinity TCR clones are biased towards divergent and  $\text{Tex}^{\text{term}}$   
605 differentiation trajectories, while low-affinity TCR clones are biased towards a  $\text{Tex}^{\text{KLR}}$   
606 trajectory. However, the presence of clones with divergent behavior suggests that there  
607 may be additional paths to induce TCR signal strength variation – perhaps via inhibitory  
608 receptor signaling, access to antigen, antigen-presenting cell type, or other factors – to  
609 generate  $\text{Tex}^{\text{KLR}}$ . Importantly,  $\text{Tex}^{\text{KLR}}$ -biased clones were dramatically depleted in the  
610 liver microenvironment, suggesting that these clones and this phenotype are sensitive  
611 to the antigen-rich environment of the liver and are unable to persist. Given the high  
612 viral load and inflammatory microenvironment of the liver during infections, these results  
613 suggest that the  $\text{Tex}^{\text{term}}$  phenotype precludes activation-induced cell death, improves  
614  $\text{Tex}$  persistence, and preserves anti-viral effector function in the organ system [47].

615 Finally, these findings may have several implications for cancer, where T cell  
616 exhaustion can limit the T cell response and efficacy of immunotherapies. First, several  
617 ongoing therapeutic strategies aim to reverse exhaustion; however, our results suggest  
618 that  $\text{Tex}^{\text{term}}$  may be specifically adapted to survive in high antigen niches, and that  
619 inhibiting  $\text{Tex}^{\text{term}}$  differentiation may be deleterious, rather than beneficial, to the T cell  
620 response [4, 15, 16, 18, 19, 48]. Whether the pro-survival aspects of T cell exhaustion  
621 can be specifically maintained, while still reinvigorating other aspects of effector function  
622 will require further study. Second, our findings reinforce the notion that TCR signal  
623 strength directs the phenotypic fate of T cells, in addition to mediating recognition of  
624 specific antigens [49, 50]. Thus, the generation of TCR-based cellular therapies should  
625 incorporate the assessment of phenotypic outcomes of TCR activation, in addition to  
626 peptide-MHC binding properties. Finally, the observation that a polyclonal T cell  
627 response to chronic antigens balances persistence, effector, and potential memory  
628 functions via the development of two  $\text{Tex}$  states suggests that future cellular therapies  
629 should also aim to establish divergent phenotypes, encompassing  $\text{Tex}^{\text{term}}$  and  $\text{Tex}^{\text{KLR}}$ .  
630 Future studies should investigate whether  $\text{Tex}^{\text{KLR}}$  develop during tumor-specific T cell  
631 responses. A recent study identified a natural killer (NK) cell-like signature in chronic  
632 antigen-induced exhausted human chimeric antigen receptor (CAR)-T cells, which  
633 resembles the  $\text{Tex}^{\text{KLR}}$  signature described here, suggesting that this cell type may be  
634 present in adoptive cell therapy settings as well [51]. Manipulation of these  $\text{Tex}$  states  
635 and their underlying gene regulatory programs and differentiation pathways may provide  
636 avenues to improve T cell-based immunotherapies in the future.

637

### 638 **Acknowledgements:**

639 We thank the members of the Satpathy, Egawa and Chang labs for stimulating  
640 discussions. This work was supported by the National Institutes of Health (NIH)  
641 K08CA230188 (A.T.S.), U01CA260852 (A.T.S.), RM1-HG007735 (H.Y.C.),  
642 R01AI130152 (T.E.), R21AI161040 (T.E.), a Career Award for Medical Scientists from  
643 the Burroughs Wellcome Fund (A.T.S.), a Technology Impact Award from the Cancer  
644 Research Institute (A.T.S.), an ASH Scholar Award from the American Society of

645 Hematology (A.T.S.), the Parker Institute for Cancer Immunotherapy (H.Y.C., and  
646 A.T.S.), a Leukemia and Lymphoma Society Scholar Award (T.E.), and the Scleroderma  
647 Research Foundation (H.Y.C.). H.Y.C. is an investigator of the Howard Hughes Medical  
648 Institute. K.E.Y. was supported by the National Science Foundation Graduate Research  
649 Fellowship Program (NSF DGE-1656518), a Stanford Graduate Fellowship and a NCI  
650 Predoctoral to Postdoctoral Fellow Transition Award (NIH F99CA253729). J.A.B was  
651 supported by a Stanford Graduate Fellowship and a National Science Foundation  
652 Graduate Research Fellowship under Grant No. DGE-1656518. The sequencing data  
653 was generated with instrumentation purchased with NIH funds: S10OD018220 and  
654 1S10OD021763.

655

#### 656 **Author contributions:**

657 B.D., K.E.Y. and A.T.S. conceptualized the study. B.D., K.E.Y. and A.T.S. wrote and  
658 edited the manuscript and all authors reviewed and provided comments on the  
659 manuscript. B.D., K.S., K.E.Y., K.J.H.G., X.Y. and Y.Q. performed experiments. K.E.Y.,  
660 S.L.M. and J.A.B. analyzed data. B.D., K.E.Y., J.R.G., E.J.W., H.Y.C., T.E. and A.T.S.  
661 guided experiments and data analysis.

662

#### 663 **Declaration of interests:**

664 A.T.S. is a founder of Immunai and Cartography Biosciences and receives research  
665 funding from Allogene Therapeutics, Merck Research Laboratories, and 10x Genomics.  
666 H.Y.C. is a co-founder of Accent Therapeutics, Boundless Bio and Cartography  
667 Biosciences, and an advisor to 10x Genomics, Arsenal Biosciences, and Spring  
668 Discovery. K.E.Y. is a consultant for Cartography Biosciences. J.A.B. is a consultant for  
669 Immunai.

670

#### 671 **Data availability**

672 Reviewer access for sequencing data is available under GEO accession: GSE188670.

673

#### 674 **Methods**

675

#### 676 **Mice and infection**

677 Male C57BL/6N mice were purchased from Charles River Laboratories. All mice were  
678 housed in a specific pathogen-free facility at Washington University in St. Louis and  
679 were used for infection at 8–12 week of age. LCMV infection was performed essentially  
680 as described previously [52]. All experiments were performed according to a protocol  
681 approved by Washington University's Institutional Animal Care and Use Committee.

#### 682 **Tissue preparation**

683 Single cell suspension of the different organs was prepared by manual dissociation.  
684 Organs were minced and gently pushed through a 40-micron strainer. Spleen single cell  
685 suspensions were spun, and red blood cells were lysed with ACK-lysis buffer by  
686 resuspending the cell pellet followed by 2 minutes incubation. Cells were then washed  
687 with ice-cold PBS and stained for sorting in FACS buffer (PBS, 0.1% BSA, 2mM EDTA,  
688 5% FBS). For the lung and liver single-cell suspension, organs were cut into small  
689 pieces and gently pushed through a 40-micron diameter strainer. Single-cell

690 suspensions were then layered on top of Ficoll-Paque Plus (Cytiva) and centrifuged  
691 according to the manufacturer's recommendations. The lymphocyte fraction was  
692 collected and washed with ice-cold PBS, and then stained for sorting.

693

### 694 **Staining T cells for sorting**

695 Single cell suspensions were stained with the following antibodies: CD8b (PerCP-  
696 Cy5.5), PD-1 (PE-Cy7), CX3CR1 (APC), SLAMF6 (BV605) and the class I tetramer, H-  
697 2Db LCMV gp33-41 (KAVYNFATC) (PE). Cells were stained with the tetramer for 20  
698 minutes at 4C followed by staining with the combination of the other antibodies for 20  
699 minutes. Cells were washed in FACS buffer and stained with LIVE/DEAD Fixable Aqua  
700 dead cell stain for 20 minutes in PBS.

701

### 702 **scATAC-seq sample and library generation**

703 Single cell ATAC-seq experiments were performed on the 10x Chromium platform as  
704 described earlier [53]. Briefly, after sorting, T cells were washed with PBS + 0.04% BSA  
705 and then subjected to nuclei isolation according to the protocol of the manufacturer.  
706 Nuclei were counted and on average ~10,000 nuclei were submitted for tagmentation.  
707 After tagmentation, nuclei were loaded for capture using the 10x Chromium controller.  
708 After Gel emulsion generation, linear amplification was performed, followed by DNA  
709 purification according to the manufacturer's protocol. The resulting DNA was used for  
710 library construction as described on the website of the manufacturer. Libraries were  
711 quantified by Agilent Bioanalyzer and were sequenced on an Illumina NovaSeq S4  
712 sequencer, using the following setup: 50bp read 1N, 8bp i7 index, 16bp i5 index and  
713 50bp read 2N. In this reaction, 1N and 2N refers to the DNA insert sequencing, while i5  
714 and i7 sequencing identifies the individual barcodes of single cells.

715

### 716 **Single-cell RNA-seq library preparation**

717 Single-cell RNA-seq libraries were prepared using the 10X 5' Single Cell Immune  
718 Profiling Solution Kit (v1.1 Chemistry), according to the manufacturer's instructions.  
719 Briefly, FACS sorted cells were washed once with PBS + 0.04% BSA and on average  
720 10,000 cells were submitted for capture using the 10x Chromium controller. Following  
721 reverse transcription and cell barcoding in droplets, emulsions were broken, and cDNA  
722 was purified using Dynabeads MyOne SILANE followed by PCR amplification (98°C for  
723 45 sec; 14 cycles of 98°C for 20 sec, 67°C for 30 sec, 72°C for 1 min; 72°C for 1 min).  
724 For gene expression library construction, 50 ng of amplified cDNA was fragmented,  
725 end-repaired, and double-sided size selected with SPRIselect beads. Purified DNA was  
726 subjected to PCR amplification with sample indexing primers (98°C for 45 sec; 14 cycles  
727 of 98°C for 20 sec, 54°C for 30 sec, 72°C for 20 sec; 72°C for 1 min). Amplified DNA  
728 was double-sided size selected with SPRIselect beads and were quantified using  
729 Agilent Bioanalyzer. Single-cell RNA-seq libraries were sequenced on an Illumina  
730 NovaSeq S4 sequencer using the following read configuration 26bp Read1, 8bp i7  
731 Index, 91bp Read2.

732

### 733 **Single-cell TCR library generation**

734 Single-cell TCR libraries were prepared with the 10x Chromium Single Cell V(D)J  
735 Enrichment Kit for mouse T cells (v1.1 Chemistry) following the manufacturer's protocol.



736 Briefly, after cDNA amplification and clean up, 2ul of cDNA was used for target  
737 enrichment. First, target enrichment 1 was performed by specific primers followed by a  
738 SPRIselect bead clean-up. Second, target enrichment 2 was performed with specific  
739 primers followed by double-sided size selection with SPRIselect beads. After the two  
740 target enrichment steps, the quality of the product was assessed with Agilent  
741 Bioanalyzer. Amplified product was then subjected for fragmentation, followed by end  
742 repair and A-tailing. End repaired product was then subjected to adaptor ligation  
743 followed by SPRIselect bead purification. Product was amplified and barcoded with  
744 adaptor specific primers and the quality of the resulting libraries were determined by  
745 Agilent Bioanalyzer. Single-cell TCR-seq libraries were sequenced on an Illumina  
746 NovaSeq S4 sequencer using the following read configuration 26bp Read1, 8bp i7  
747 Index, 91bp Read2.

748

#### 749 **scATAC-seq data processing and analysis**

750 scATAC-seq datasets were processed as described previously [54]. Briefly, reads were  
751 filtered, trimmed, and aligned to the mm10 reference genome using 10X Genomics'  
752 cellranger-atac count pipeline (version 1.2.0).

753

754 Processed fragment files were loaded into ArchR (version 1.0.1) for additional  
755 processing and analysis. All functions used default parameters unless otherwise  
756 specified. Cells were filtered during Arrow file generation using ArchR's  
757 createArrowFiles function to remove cells with an enrichment of Tn5 insertions in  
758 transcription start sites (TSS enrichment) of less than 4 or less than 1000 unique  
759 fragments. Doublets were identified using ArchR's addDoubletScores function and  
760 predicted doublets removed using ArchR's filterDoublets function. Dimensionality  
761 reduction was performed using Iterative Latent Semantic Indexing (LSI) using ArchR's  
762 addIterativeLSI function. After initial clustering and UMAP projection, we excluded a  
763 small cluster of non-T cells. Cell clustering was performed using ArchR's addClusters  
764 function on IterativeLSI reduced dimensions 1:10 and a resolution of 0.4 (reducedDims  
765 = "IterativeLSI", dimsToUse = 1:10, resolution = 0.4). The same dimensions were used  
766 for single cell embedding by Uniform Manifold Approximation and Projection (UMAP)  
767 using ArchR's addUMAP function using IterativeLSI reduced dimensions 1:10 and a  
768 minimum distance of 0.1 (reducedDims = "IterativeLSI", dimsToUse = 1:10, minDist =  
769 0.1). Cell clustering and UMAP projection for Chronic LCMV (D8 and D14, Figure 3) and  
770 Day 8 (Chronic and Acute, Figure S3B) subsets were performed as described above  
771 with the following modifications: dimsToUse = NULL, resolution = 0.2, and minDist =  
772 0.4.

773

774 GeneScore matrices were computed by summing Tn5 insertions in the gene promoter  
775 and gene body during Arrow file generation using ArchR's createArrowFiles function  
776 [54]. Gene score imputation was performed with Magic using ArchR's  
777 addImputeWeights function [55]. After clustering the cells, peaks were called by MACS2  
778 on pseudoreplicates sampled from each cluster to obtain a reproducible peak set  
779 retaining cell type specific peaks using ArchR's addReproduciblePeakSet function.  
780 Peak co-accessibility and Peak2Gene linkages were computed using ArchR's  
781 addCoAccessibility and addPeak2GeneLinks functions. Transcription factor (TF) motif

782 deviations were computed with chromVar using ArchR's addDeviationsMatrix function  
783 [26]. Pseudo-bulk tracks for indicated groups of cells were plotted using ArchR's  
784 plotBrowserTrack function with default normalization method based on reads in  
785 transcription start sites ("ReadsInTSS"). Differential peak testing was performed using  
786 ArchR's getMarkerFeatures function with testMethod = "wilcoxon" and bias =  
787 c("TSSEnrichment", "log10(nFrag)"). TF motif enrichment in differential peaks was  
788 performed using ArchR's peakAnnoEnrichment function. Trajectory analysis was  
789 performed using ArchR's addTrajectory and plotTrajectory functions. Identification of  
790 positive TF regulators was performed using ArchR's correlateMatrices function to  
791 examine the correlation between chromVar deviation z-scores of TF motifs  
792 ("MotifMatrix") and imputed gene expression ("GeneIntegrationMatrix") following cross-  
793 platform linkage with scRNA-seq data using ArchR's addGeneIntegrationMatrix.  
794

### 795 **scRNA-, TCR-seq computational methods**

796 scRNA-seq reads were aligned to the mm10 reference genome and quantified using  
797 cellranger count (10x Genomics, version 3.1.0). Filtered gene-barcode matrices that  
798 contained only barcodes with unique molecular identifier (UMI) counts that passed the  
799 threshold for cell detection were used for further analysis. scTCR reads were aligned to  
800 the mm10 reference genome and consensus TCR annotation was performed using  
801 cellranger vdj (10x Genomics, version 3.1.0). TCR annotation was performed using the  
802 10x cellranger vdj pipeline as described.  
803

804 Additional analysis was performed in R (version 4.0.3) using Seurat (version 4.0.1)  
805 using default function parameters unless otherwise noted [56]. Doublets were predicted  
806 using DoubletFinder (version 2.0.3) [57]. Cell types were predicted using SingleR  
807 (version 1.4.1) based on mouse bulk RNA-seq reference data (MouseRNAseqData)  
808 from celldex (version 1.0.0) [58]. Cells with less than 200 genes detected, greater than  
809 5% mitochondrial RNA content, predicted doublets from DoubletFinder, and cells  
810 annotated as non-T and non-NK cells by SingleR were excluded from analysis. We  
811 predicted cell cycle phase based on previously defined gene sets using the  
812 CellCycleScoring function [59]. We then split cells by experimental batch and cell cycle  
813 (non-cycling or G1 vs. cycling or G2M/S) into four datasets using Seurat's SplitObject  
814 and performed batch correction using Seurat's reciprocal PCA workflow. First, we  
815 normalized and identified variable features for each dataset independently using  
816 Seurat's NormalizeData and FindVariableFeatures. Then we selected variable features  
817 across datasets using Seurat's SelectIntegrationFeatures. We excluded variable TCR  
818 (^Tr.v) genes, variable Ig (^Ig.v) genes, cell cycle genes (used for cell cycle scoring),  
819 and mitochondrial genes (^mt-) from integration features used for downstream analysis.  
820 We then scaled data and ran PCA on each dataset independently using these features  
821 using Seurat's ScaleData and RunPCA. We identified integration anchors using  
822 Seurat's FindIntegrationAnchors using non-cycling datasets as reference datasets and  
823 rPCA for dimensionality reduction. We integrated all datasets using Seurat's  
824 IntegrateData using dims=1:50. Integrated data was used for data scaling with  
825 ScaleData and PCA dimensionality reduction with RunPCA. After initial clustering we  
826 noted three small clusters representing 7% of total cells which had low number of genes  
827 detected and high mitochondrial RNA content which were excluded from further

828 analysis. Clusters were identified using shared nearest neighbor (SNN) based clustering  
829 based on the first 15 PCs with resolution = 0.45. The same principal components were  
830 used to generate the UMAP projections, which were generated with a minimum  
831 distance of 0.1. Cell clustering and UMAP projection for Chronic Day 21 T cells (all  
832 tissues, Figure 2 and Figure 5), spleen derived T cells (Chronic and Acute, Day 8 and  
833 Day 21, Figure 4 and Figure 6), and Day 8 T cells (Spleen, Chronic and Acute,  
834 Supplemental Figure 3) were performed as described above with the following  
835 modifications:

836 Chronic Day 21 T cells: dims = 1:10, resolution = 0.25, min.dist = 0.1  
837 Spleen derived T cells: dims = 1:8, k.param = 50, resolution = 0.45, min.dist = 0.1  
838 Day 8 T cells: dims = 1:12, k.param = 40, resolution = 0.28, min.dist = 0.2  
839

840 Expression of selected genes was plotted using log normalized gene expression values  
841 based on original RNA count data prior to data integration. Marker genes were identified  
842 using Seurat's FindAllMarkers using a cutoff of  $p\_val\_adj < 0.01$ . Differential gene  
843 expression analysis was performed using Seurat's FindMarkers using a cutoff of  
844  $p\_val\_adj < 0.05$  and  $abs(avg\_log2FC) > 0.25$ . Gene module scoring was performed  
845 using Seurat's AddModuleScore. TCR clone behaviors were visualized using UpSetR  
846 (version 1.4.0). Null distribution of TCR clone behaviors was determined by randomly  
847 shuffling TCR clonotype and scRNA phenotype and generating a distribution of TCR  
848 clone phenotype combinations (n=50 iterations). Morisita-Horn index for quantifying  
849 TCR overlap was calculated using the mh function from the R package divo (version  
850 1.0.1).

851

## 852 References

- 853 1. Hashimoto, M., et al., *CD8 T Cell Exhaustion in Chronic Infection and Cancer: Opportunities for Interventions*. *Annu Rev Med*, 2018. **69**: p. 301-318.
- 854 2. McLane, L.M., M.S. Abdel-Hakeem, and E.J. Wherry, *CD8 T Cell Exhaustion During Chronic Viral Infection and Cancer*. *Annu Rev Immunol*, 2019. **37**: p. 457-495.
- 855 3. Blank, C.U., et al., *Defining 'T cell exhaustion'*. *Nat Rev Immunol*, 2019. **19**(11): p. 665-674.
- 856 4. Scott, A.C., et al., *TOX is a critical regulator of tumour-specific T cell differentiation*. *Nature*, 2019. **571**(7764): p. 270-274.
- 857 5. Paley, M.A., et al., *Progenitor and terminal subsets of CD8+ T cells cooperate to contain chronic viral infection*. *Science*, 2012. **338**(6111): p. 1220-5.
- 858 6. Im, S.J., et al., *Defining CD8+ T cells that provide the proliferative burst after PD-1 therapy*. *Nature*, 2016. **537**(7620): p. 417-421.
- 859 7. Utzschneider, D.T., et al., *T Cell Factor 1-Expressing Memory-like CD8(+) T Cells Sustain the Immune Response to Chronic Viral Infections*. *Immunity*, 2016. **45**(2): p. 415-27.
- 860 8. Hudson, W.H., et al., *Proliferating Transitory T Cells with an Effector-like Transcriptional Signature Emerge from PD-1(+) Stem-like CD8(+) T Cells during Chronic Infection*. *Immunity*, 2019. **51**(6): p. 1043-1058 e4.
- 861
- 862
- 863
- 864
- 865
- 866
- 867
- 868
- 869
- 870
- 871

- 872 9. Zander, R., et al., *CD4(+) T Cell Help Is Required for the Formation of a Cytolytic*  
873 *CD8(+) T Cell Subset that Protects against Chronic Infection and Cancer.*  
874 *Immunity*, 2019. **51**(6): p. 1028-1042 e4.
- 875 10. Beltra, J.C., et al., *Developmental Relationships of Four Exhausted CD8(+) T*  
876 *Cell Subsets Reveals Underlying Transcriptional and Epigenetic Landscape*  
877 *Control Mechanisms.* *Immunity*, 2020. **52**(5): p. 825-841 e8.
- 878 11. He, R., et al., *Follicular CXCR5- expressing CD8(+) T cells curtail chronic viral*  
879 *infection.* *Nature*, 2016. **537**(7620): p. 412-428.
- 880 12. Wu, T., et al., *The TCF1-Bcl6 axis counteracts type I interferon to repress*  
881 *exhaustion and maintain T cell stemness.* *Sci Immunol*, 2016. **1**(6).
- 882 13. Raju, S., et al., *Identification of a T-bet(hi) Quiescent Exhausted CD8 T Cell*  
883 *Subpopulation That Can Differentiate into TIM3(+)CX3CR1(+) Effectors and*  
884 *Memory-like Cells.* *J Immunol*, 2021.
- 885 14. Utzschneider, D.T., et al., *Early precursor T cells establish and propagate T cell*  
886 *exhaustion in chronic infection.* *Nat Immunol*, 2020. **21**(10): p. 1256-1266.
- 887 15. Khan, O., et al., *TOX transcriptionally and epigenetically programs CD8(+) T cell*  
888 *exhaustion.* *Nature*, 2019. **571**(7764): p. 211-218.
- 889 16. Alfei, F., et al., *TOX reinforces the phenotype and longevity of exhausted T cells*  
890 *in chronic viral infection.* *Nature*, 2019. **571**(7764): p. 265-269.
- 891 17. Yao, C., et al., *BACH2 enforces the transcriptional and epigenetic programs of*  
892 *stem-like CD8(+) T cells.* *Nat Immunol*, 2021. **22**(3): p. 370-380.
- 893 18. Yao, C., et al., *Single-cell RNA-seq reveals TOX as a key regulator of CD8(+) T*  
894 *cell persistence in chronic infection.* *Nat Immunol*, 2019. **20**(7): p. 890-901.
- 895 19. Seo, H., et al., *TOX and TOX2 transcription factors cooperate with NR4A*  
896 *transcription factors to impose CD8(+) T cell exhaustion.* *Proc Natl Acad Sci U S*  
897 *A*, 2019. **116**(25): p. 12410-12415.
- 898 20. Pauken, K.E., et al., *Epigenetic stability of exhausted T cells limits durability of*  
899 *reinvigoration by PD-1 blockade.* *Science*, 2016. **354**(6316): p. 1160-1165.
- 900 21. Matloubian, M., et al., *Molecular determinants of macrophage tropism and viral*  
901 *persistence: importance of single amino acid changes in the polymerase and*  
902 *glycoprotein of lymphocytic choriomeningitis virus.* *J Virol*, 1993. **67**(12): p. 7340-  
903 9.
- 904 22. Matloubian, M., et al., *Genetic basis of viral persistence: single amino acid*  
905 *change in the viral glycoprotein affects ability of lymphocytic choriomeningitis*  
906 *virus to persist in adult mice.* *J Exp Med*, 1990. **172**(4): p. 1043-8.
- 907 23. Stamm, A., et al., *An intermediate dose of LCMV clone 13 causes prolonged*  
908 *morbidity that is maintained by CD4+ T cells.* *Virology*, 2012. **425**(2): p. 122-32.
- 909 24. Wherry, E.J., et al., *Viral persistence alters CD8 T-cell immunodominance and*  
910 *tissue distribution and results in distinct stages of functional impairment.* *J Virol*,  
911 2003. **77**(8): p. 4911-27.
- 912 25. Pliner, H.A., et al., *Cicero Predicts cis-Regulatory DNA Interactions from Single-*  
913 *Cell Chromatin Accessibility Data.* *Mol Cell*, 2018. **71**(5): p. 858-871 e8.
- 914 26. Schep, A.N., et al., *chromVAR: inferring transcription-factor-associated*  
915 *accessibility from single-cell epigenomic data.* *Nat Methods*, 2017. **14**(10): p.  
916 975-978.

- 917 27. Chen, Y., et al., *BATF regulates progenitor to cytolytic effector CD8(+) T cell*  
918 *transition during chronic viral infection*. Nat Immunol, 2021. **22**(8): p. 996-1007.
- 919 28. Stelekati, E., et al., *Long-Term Persistence of Exhausted CD8 T Cells in Chronic*  
920 *Infection Is Regulated by MicroRNA-155*. Cell Rep, 2018. **23**(7): p. 2142-2156.
- 921 29. Chen, J., et al., *NR4A transcription factors limit CAR T cell function in solid*  
922 *tumours*. Nature, 2019. **567**(7749): p. 530-534.
- 923 30. Liu, X., et al., *Genome-wide analysis identifies NR4A1 as a key mediator of T cell*  
924 *dysfunction*. Nature, 2019. **567**(7749): p. 525-529.
- 925 31. Shan, Q., et al., *The transcription factor Runx3 guards cytotoxic CD8(+) effector*  
926 *T cells against deviation towards follicular helper T cell lineage*. Nat Immunol,  
927 2017. **18**(8): p. 931-939.
- 928 32. Martinez, G.J., et al., *The transcription factor NFAT promotes exhaustion of*  
929 *activated CD8(+) T cells*. Immunity, 2015. **42**(2): p. 265-278.
- 930 33. Chung, H.K., B. McDonald, and S.M. Kaech, *The architectural design of CD8+ T*  
931 *cell responses in acute and chronic infection: Parallel structures with divergent*  
932 *fates*. J Exp Med, 2021. **218**(4).
- 933 34. Evrard, M., et al., *Sphingosine 1-phosphate receptor 5 (S1PR5) regulates the*  
934 *peripheral retention of tissue-resident lymphocytes*. J Exp Med, 2022. **219**(1).
- 935 35. Mueller, P., et al., *Regulation of T cell survival through coronin-1-mediated*  
936 *generation of inositol-1,4,5-trisphosphate and calcium mobilization after T cell*  
937 *receptor triggering*. Nat Immunol, 2008. **9**(4): p. 424-31.
- 938 36. Lin, Y., et al., *Identification of TAPBPL as a novel negative regulator of T-cell*  
939 *function*. EMBO Mol Med, 2021. **13**(5): p. e13404.
- 940 37. Granum, S., et al., *Modulation of Lck function through multisite docking to T cell-*  
941 *specific adapter protein*. J Biol Chem, 2008. **283**(32): p. 21909-19.
- 942 38. Milner, J.J., et al., *Delineation of a molecularly distinct terminally differentiated*  
943 *memory CD8 T cell population*. Proc Natl Acad Sci U S A, 2020. **117**(41): p.  
944 25667-25678.
- 945 39. Jenne, C.N. and P. Kubers, *Immune surveillance by the liver*. Nat Immunol, 2013.  
946 **14**(10): p. 996-1006.
- 947 40. Sen, D.R., et al., *The epigenetic landscape of T cell exhaustion*. Science, 2016.  
948 **354**(6316): p. 1165-1169.
- 949 41. Pritykin, Y., et al., *A unified atlas of CD8 T cell dysfunctional states in cancer and*  
950 *infection*. Mol Cell, 2021. **81**(11): p. 2477-2493 e10.
- 951 42. Leong, Y.A., et al., *CXCR5(+) follicular cytotoxic T cells control viral infection in B*  
952 *cell follicles*. Nat Immunol, 2016. **17**(10): p. 1187-96.
- 953 43. Miller, B.C., et al., *Subsets of exhausted CD8(+) T cells differentially mediate*  
954 *tumor control and respond to checkpoint blockade*. Nat Immunol, 2019. **20**(3): p.  
955 326-336.
- 956 44. Philip, M., et al., *Chromatin states define tumour-specific T cell dysfunction and*  
957 *reprogramming*. Nature, 2017. **545**(7655): p. 452-456.
- 958 45. Abdel-Hakeem, M.S., et al., *Epigenetic scarring of exhausted T cells hinders*  
959 *memory differentiation upon eliminating chronic antigenic stimulation*. Nat  
960 Immunol, 2021. **22**(8): p. 1008-1019.
- 961 46. Yates, K.B., et al., *Epigenetic scars of CD8(+) T cell exhaustion persist after cure*  
962 *of chronic infection in humans*. Nat Immunol, 2021. **22**(8): p. 1020-1029.

- 963 47. Philip, M. and A. Schietinger, *Heterogeneity and fate choice: T cell exhaustion in*  
964 *cancer and chronic infections*. *Curr Opin Immunol*, 2019. **58**: p. 98-103.
- 965 48. Stadtmauer, E.A., et al., *CRISPR-engineered T cells in patients with refractory*  
966 *cancer*. *Science*, 2020. **367**(6481).
- 967 49. Chang, J.T., E.J. Wherry, and A.W. Goldrath, *Molecular regulation of effector and*  
968 *memory T cell differentiation*. *Nat Immunol*, 2014. **15**(12): p. 1104-15.
- 969 50. Daniels, M.A. and E. Teixeiro, *TCR Signaling in T Cell Memory*. *Front Immunol*,  
970 2015. **6**: p. 617.
- 971 51. Good, C.R., et al., *An NK-like CAR T cell transition in CAR T cell dysfunction*.  
972 *Cell*, 2021.
- 973 52. Chou, C., et al., *The Transcription Factor AP4 Mediates Resolution of Chronic*  
974 *Viral Infection through Amplification of Germinal Center B Cell Responses*.  
975 *Immunity*, 2016. **45**(3): p. 570-582.
- 976 53. Satpathy, A.T., et al., *Massively parallel single-cell chromatin landscapes of*  
977 *human immune cell development and intratumoral T cell exhaustion*. *Nat*  
978 *Biotechnol*, 2019. **37**(8): p. 925-936.
- 979 54. Granja, J.M., et al., *ArchR is a scalable software package for integrative single-*  
980 *cell chromatin accessibility analysis*. *Nat Genet*, 2021. **53**(3): p. 403-411.
- 981 55. van Dijk, D., et al., *Recovering Gene Interactions from Single-Cell Data Using*  
982 *Data Diffusion*. *Cell*, 2018. **174**(3): p. 716-729 e27.
- 983 56. Hao, Y., et al., *Integrated analysis of multimodal single-cell data*. *Cell*, 2021.  
984 **184**(13): p. 3573-3587 e29.
- 985 57. McGinnis, C.S., L.M. Murrow, and Z.J. Gartner, *DoubletFinder: Doublet Detection*  
986 *in Single-Cell RNA Sequencing Data Using Artificial Nearest Neighbors*. *Cell*  
987 *Syst*, 2019. **8**(4): p. 329-337 e4.
- 988 58. Aran, D., et al., *Reference-based analysis of lung single-cell sequencing reveals*  
989 *a transitional profibrotic macrophage*. *Nat Immunol*, 2019. **20**(2): p. 163-172.
- 990 59. Tirosh, I., et al., *Dissecting the multicellular ecosystem of metastatic melanoma*  
991 *by single-cell RNA-seq*. *Science*, 2016. **352**(6282): p. 189-96.
- 992 60. Sandu, I., et al., *Landscape of Exhausted Virus-Specific CD8 T Cells in Chronic*  
993 *LCMV Infection*. *Cell Rep*, 2020. **32**(8): p. 108078.

# Figure 1.

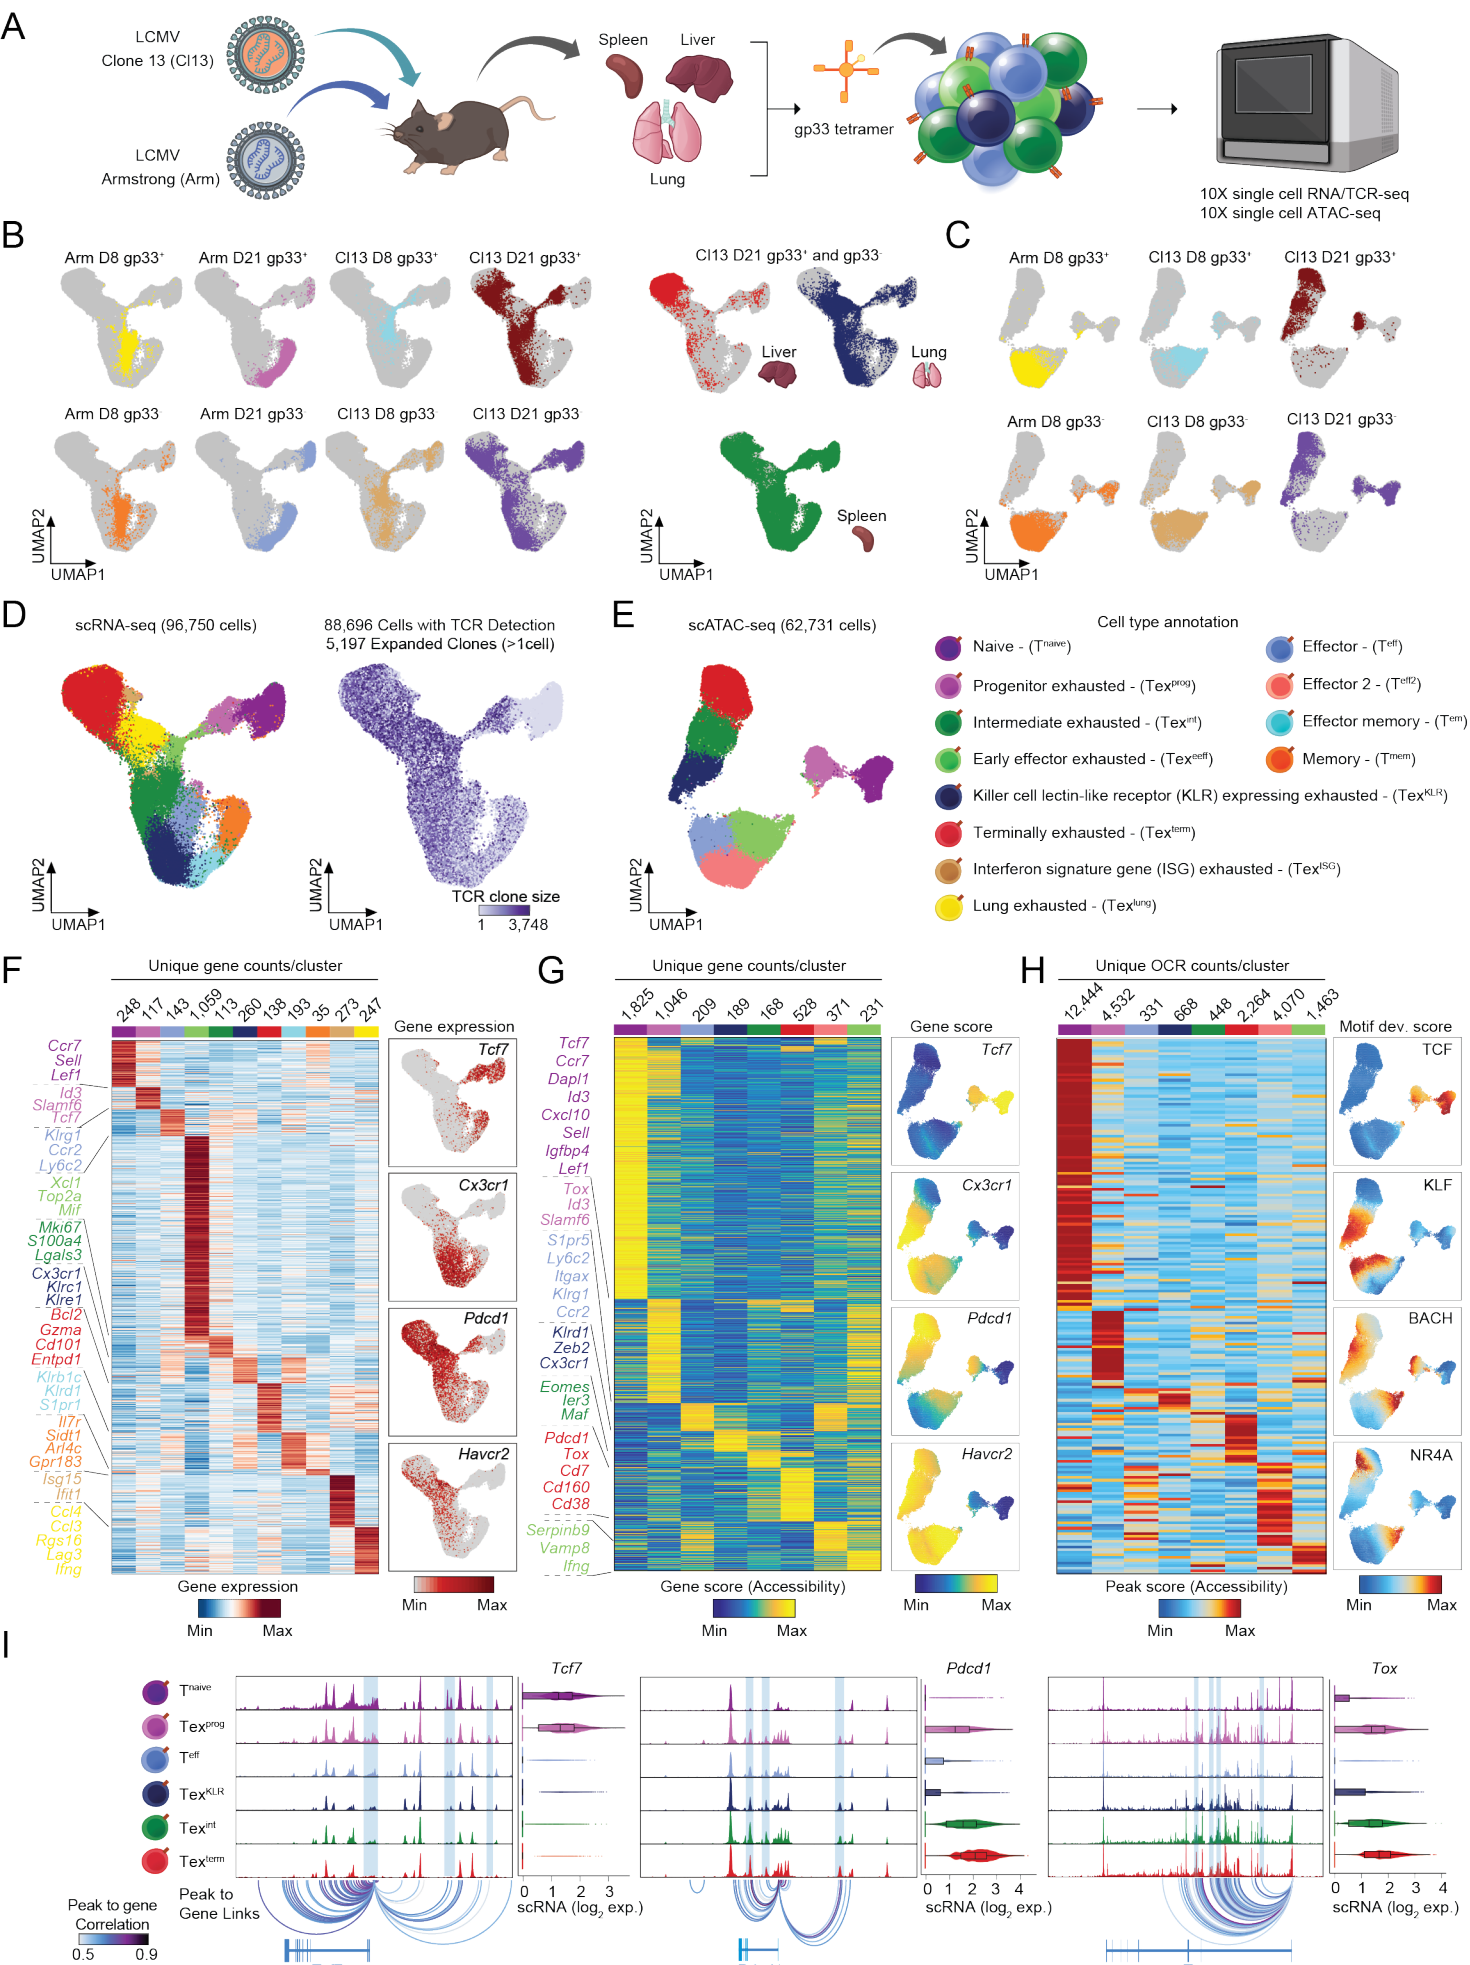

**Figure 1. Single-cell genomic atlas of T cell exhaustion during LCMV infection.**

**(A)** Schematics on the mouse model used, indicating the two viral strains, the tetramer sort and the single cell technologies applied. **(B)** UMAPs of scRNA-seq profiles colored by the samples (gp33<sup>+</sup> and gp33<sup>-</sup> fractions) sorted from the spleen of Arm- or CI13-infected animals on the indicated days (D8 and D21) (left). UMAPs of scRNA-seq profiles colored by the samples originating from the different organs of CI13-infected animals at D21 (right). **(C)** UMAPs of scATAC-seq profiles colored by the samples (gp33<sup>+</sup> and gp33<sup>-</sup> fractions) sorted from the spleen of Arm- or CI13-infected animals on the indicated days. **(D)** UMAP of all scRNA-seq profiles, colored by the annotated T cell subsets (left). UMAP of scTCR-seq results colored by the size of the expanded clones from which individual T cells originate (right). **(E)** UMAP of all scATAC-seq profiles colored by the annotated T cell subsets. **(F)** Heat map of subset specific marker genes determined by scRNA-seq. Feature plots of specific gene markers that characterize T cell subsets. **(G)** Heat map of Gene score values (accessibility) determined by scATAC-seq. Feature plots of specific Gene score values that mark main T cell subsets. **(H)** Heat map of Peak score values at the unique open chromatin regions (OCRs) of the T cell subsets determined by scATAC-seq. Feature plots show the motifs that are accessible in specific T cell subsets (chromVAR deviation scores are depicted). **(I)** Genome browser snapshots on the indicated gene loci, showing the chromatin states of the different T cell subsets. Violin plots show the associated expression level of the indicated genes from the respective T cell subsets determined by scRNA-seq.



**Figure 2.**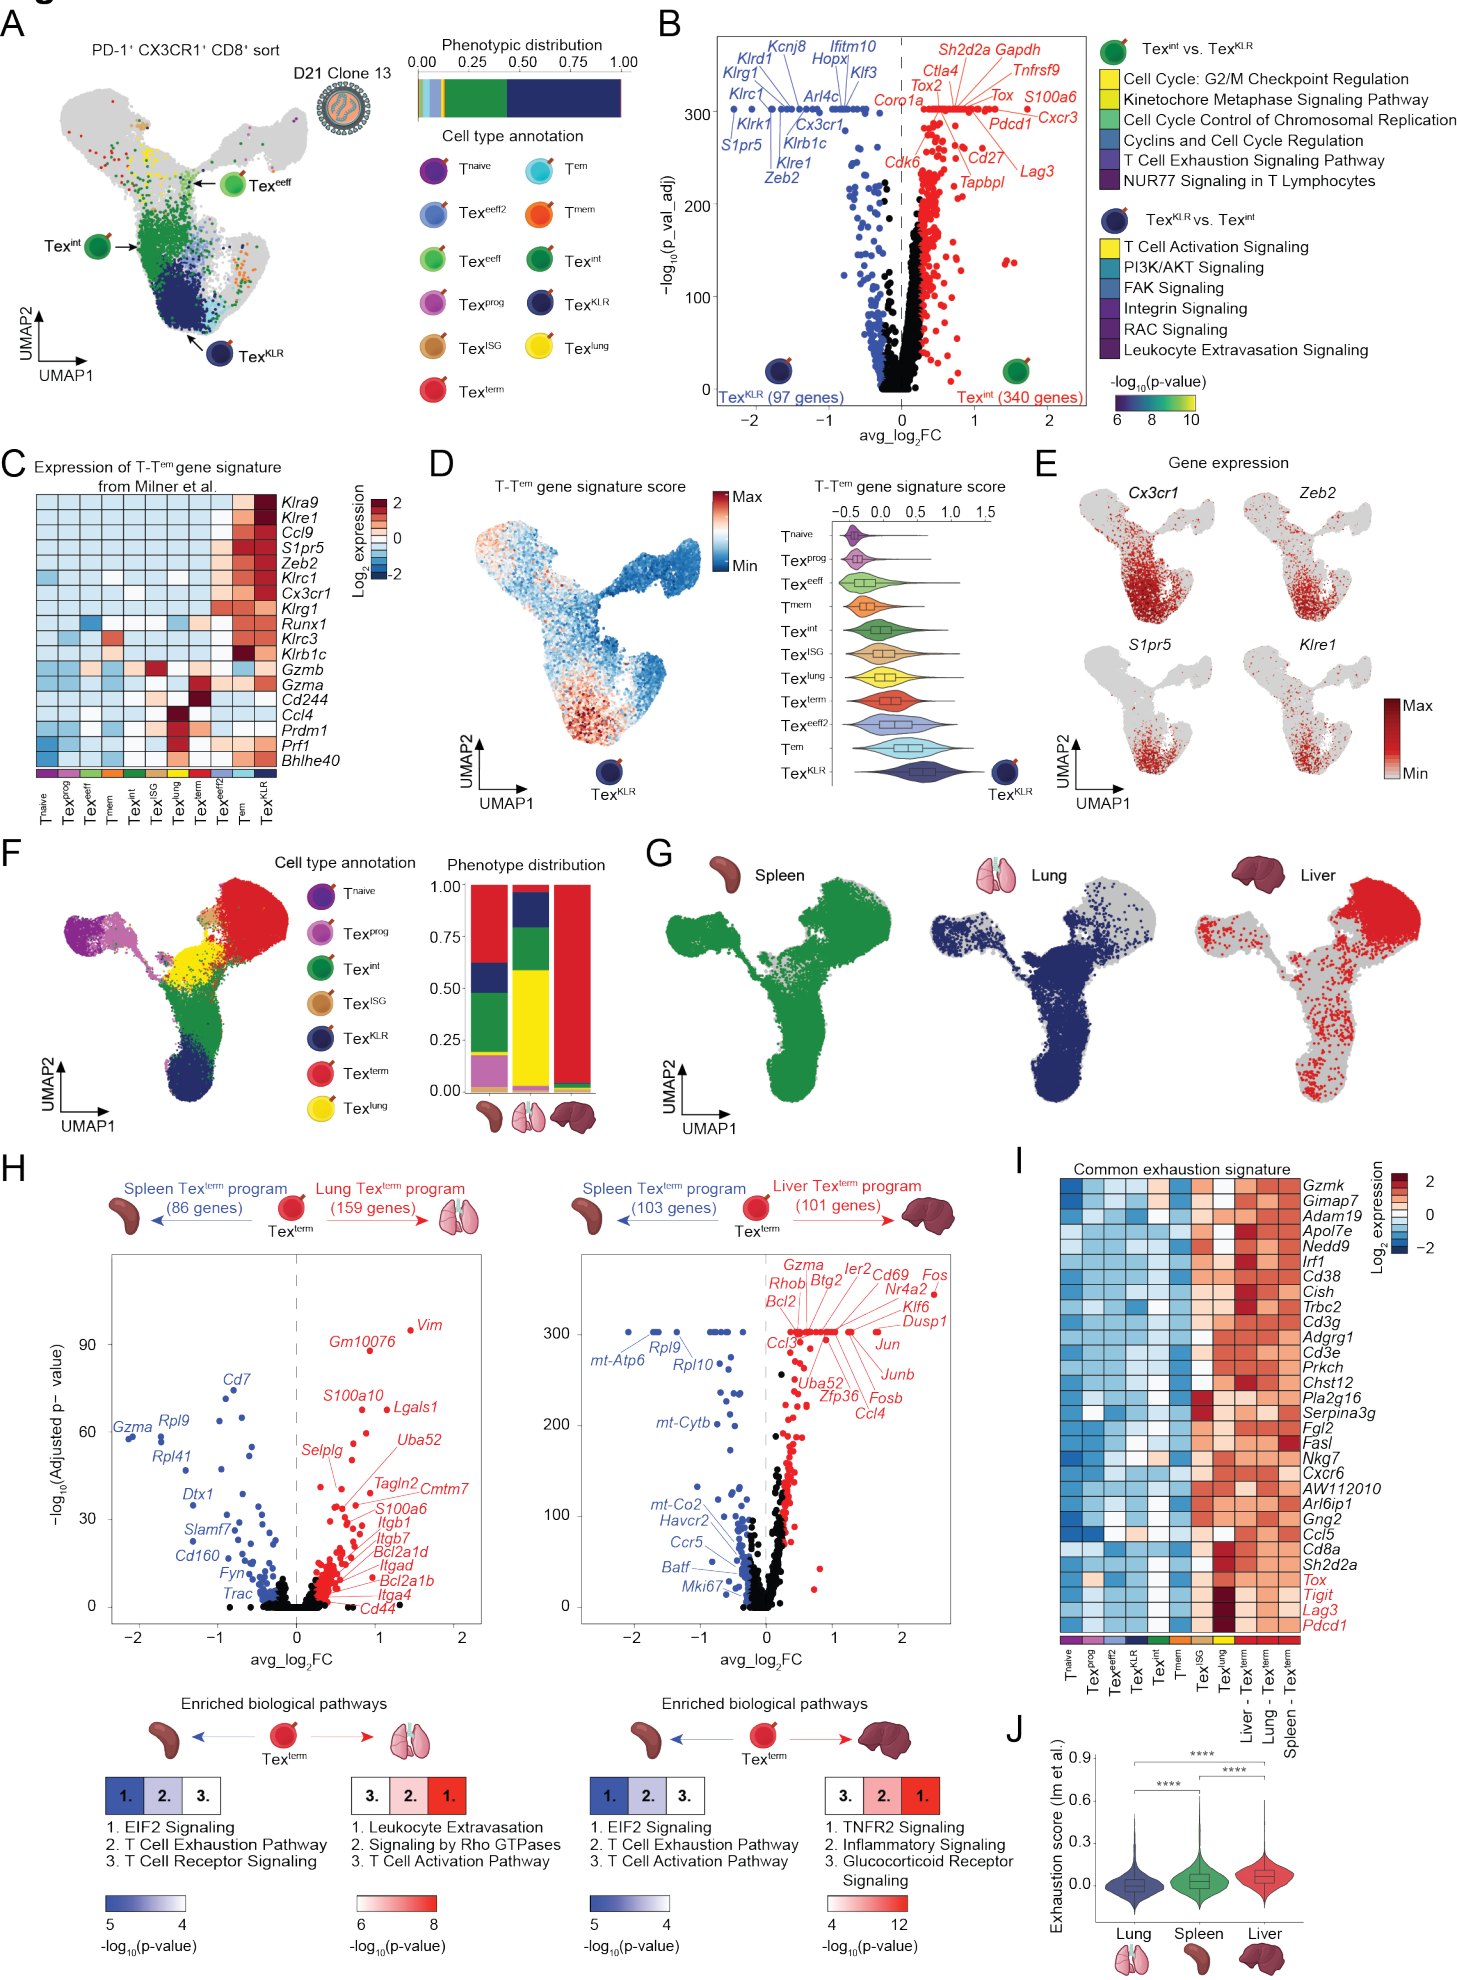

## Figure 2. Identification of early effector, KLR-expressing, and organ-specific $T_{\text{ex}}$ subsets.

**(A)** UMAP of scRNA-seq results colored by the main T cell subsets of the sorted PD-1<sup>+</sup>, CX3CR1<sup>+</sup> and CD8<sup>+</sup> T cells. Stacked bar plot shows the phenotypic distribution of the sorted population (right) **(B)** Volcano plot of differentially expressed genes between the  $T_{\text{ex}}^{\text{KLR}}$  and  $T_{\text{ex}}^{\text{int}}$  cell populations (left). Ingenuity pathway analyses on the differentially expressed genes show the enriched biological pathways in the two subsets. Top 6 hits are shown. **(C)** Heatmap of the expression of the marker genes of terminal effector memory (T- $T^{\text{em}}$ ) cells defined by Milner et al. in the indicated T cell subsets. **(D)** UMAP colored by the strength of the T- $T^{\text{em}}$  gene signature (T- $T^{\text{em}}$  module score) in the scRNA-seq dataset (left). Violin plot representation of the T- $T^{\text{em}}$  score in the indicated T cell subsets. **(E)** UMAPs colored by the expression of the indicated marker genes of the T- $T^{\text{em}}$  subset. **(F)** UMAP of scRNA-seq results from the three organs at D21 following CI13 infection colored by the annotated T cell subsets (left). Stacked bar plot representation of the phenotypic distribution of the annotated T cell subsets in the three organs (right). **(G)** UMAPs colored by the cells from the three organs. **(H)** Volcano plots of differentially expressed genes comparing the  $T_{\text{ex}}^{\text{term}}$  cell populations from the different organs. Ingenuity pathway analysis results on the differentially expressed gene groups (bottom). Top 3 hits are shown. **(I)** Heat map of the gene expression values of the common exhaustion gene signature among the organ specific  $T_{\text{ex}}^{\text{term}}$  subsets. **(J)** Violin plot depicts the exhaustion scores of the three organs based on Im et al. 2016.

**Figure 3.**

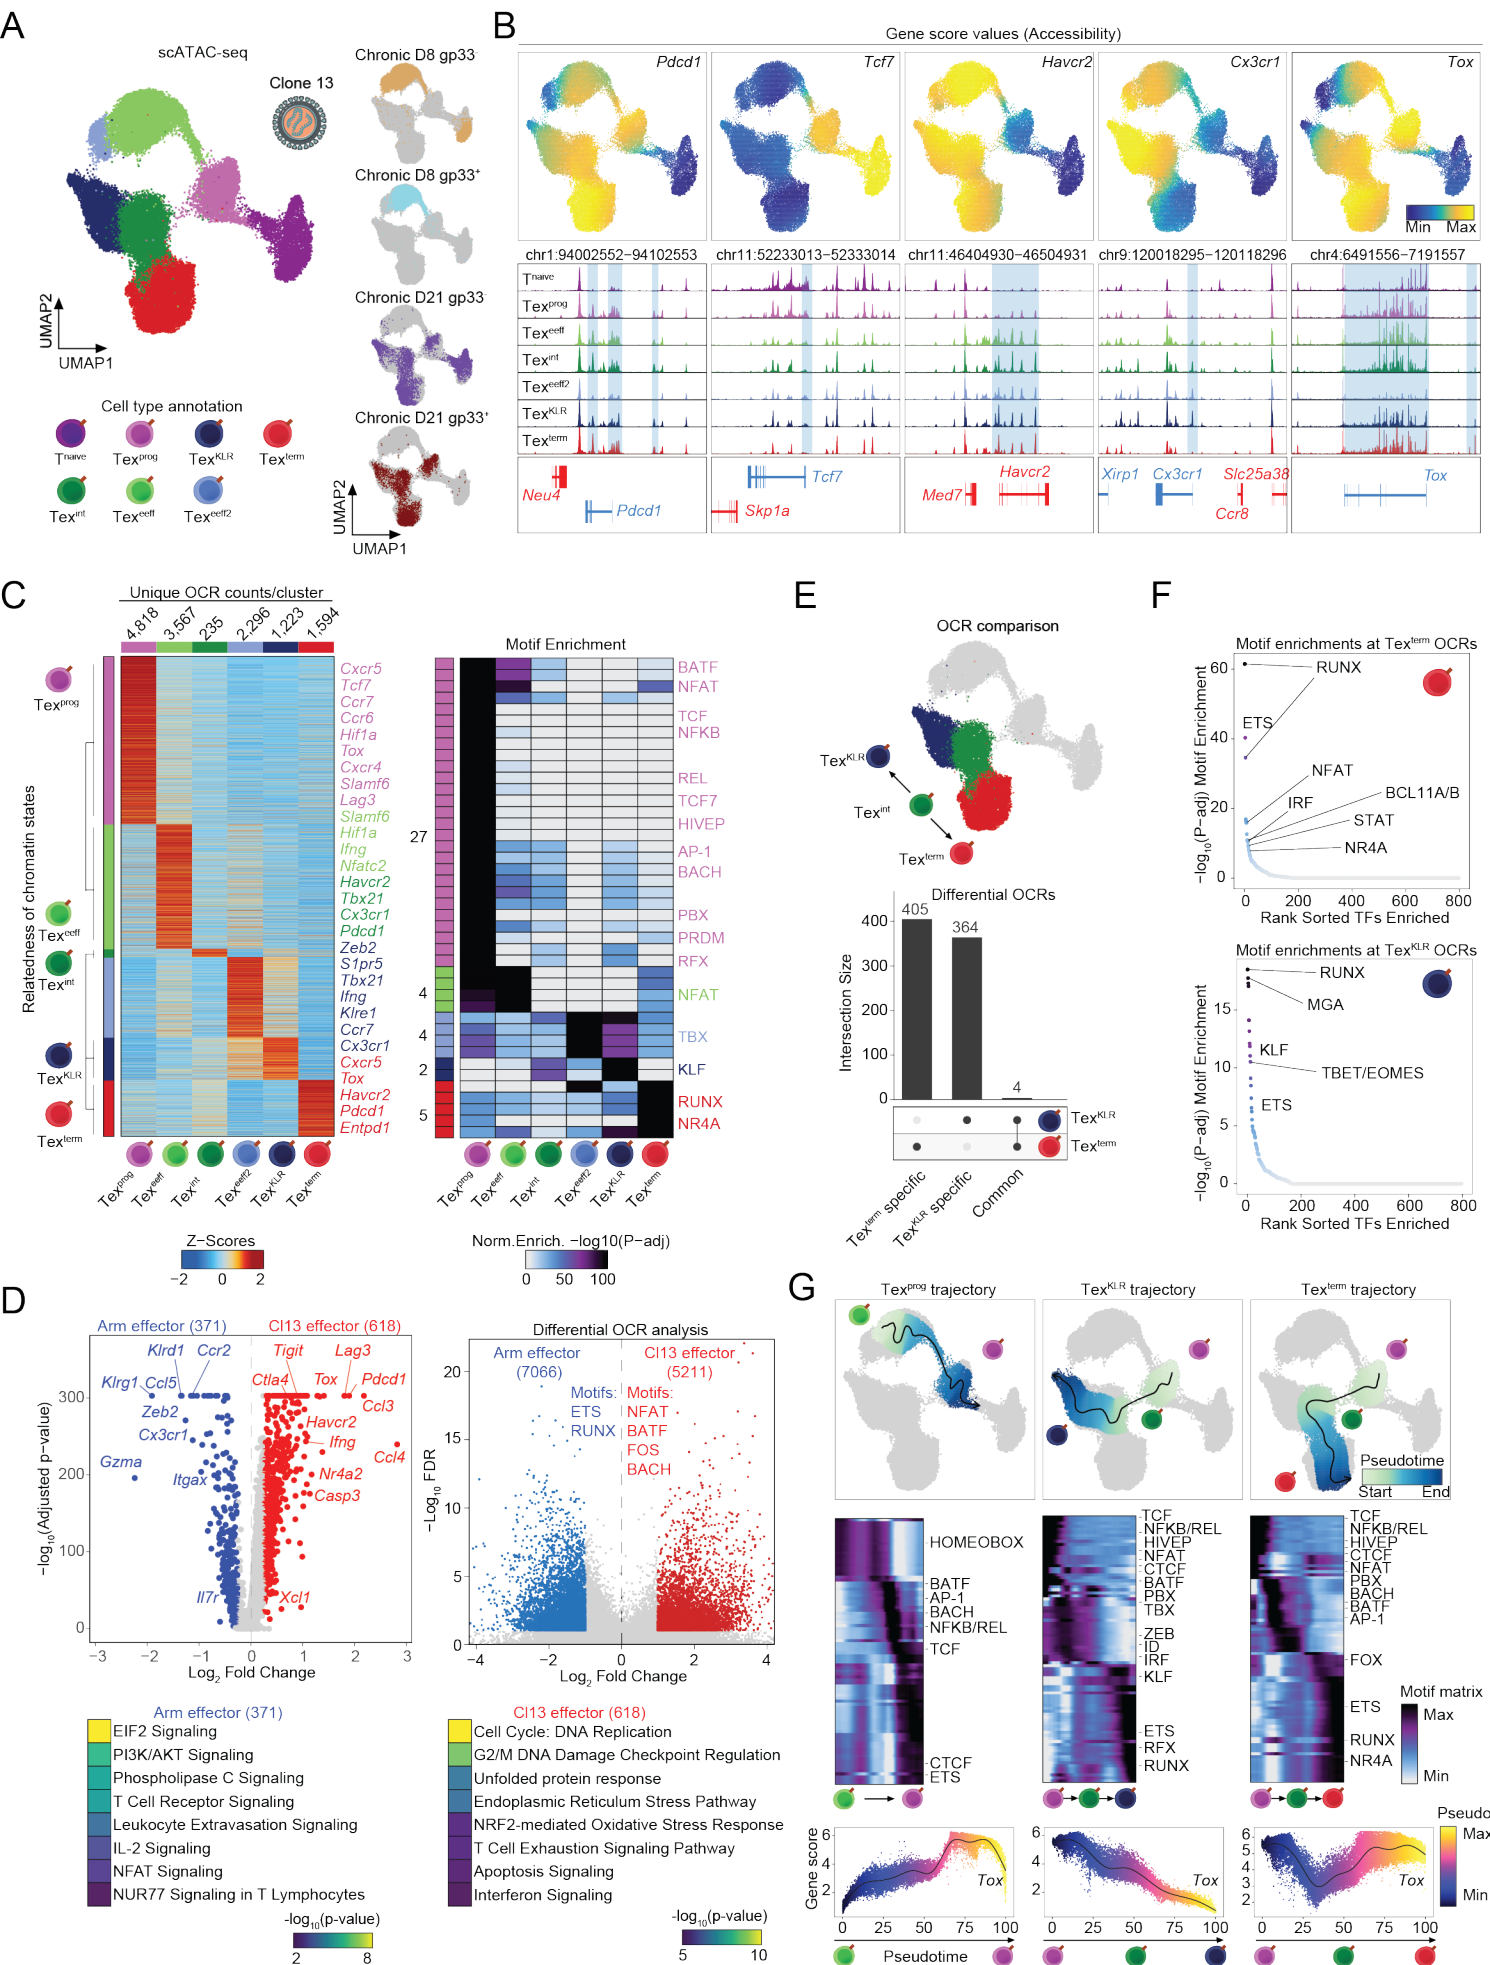

**Figure 3.  $Tex^{int}$  represent a bifurcation point of exhausted T cell fate differentiation.** (A) UMAP of scATAC-seq results of D8 and D21 gp33<sup>+</sup> and gp33<sup>-</sup> T cells from the CI13 infection model. UMAP is colored by the annotated T cell subsets. Small UMAPs (right) show T cells that originate from the indicated gp33 fractions and timepoints. (B) Feature plots of the indicated Gene score values (accessibility) (top) and genome browser snapshots of the corresponding genomic loci (bottom). (C) Heat map of Peak score values at the unique open chromatin regions (OCRs) of the T cell subsets determined by scATAC-seq with a list of annotated putative target genes based on proximity (left). Heat map of motif enrichment results at the unique OCR sets of the annotated T cell subsets. (D) Volcano plot of differentially expressed genes between the Arm effector cells and CI13 early effector cells (left). Ingenuity pathway analysis results show the top 8 enriched biological terms (bottom). Volcano plot depicts the differentially accessible OCRs between the Arm effector cells and CI13 early effector cells (right). (E) UMAP depicts the populations used for differential OCR analysis (top). Upset plot of differentially accessible OCRs and their overlap among the  $Tex^{KLR}$  and  $Tex^{term}$  populations (bottom). (F) Hockey stick plots depict the enriched transcription factor motifs at the specific OCRs of the  $Tex^{term}$  and  $Tex^{KLR}$  subsets. (G) Pseudotime trajectory analyses of three potential  $Tex$  differentiation paths (top). Heat maps show transcription factor deviation scores that change over the pseudotime trajectories (middle). Gene score values of *Tox* on the three pseudotime trajectories (bottom).

**Figure 4.**

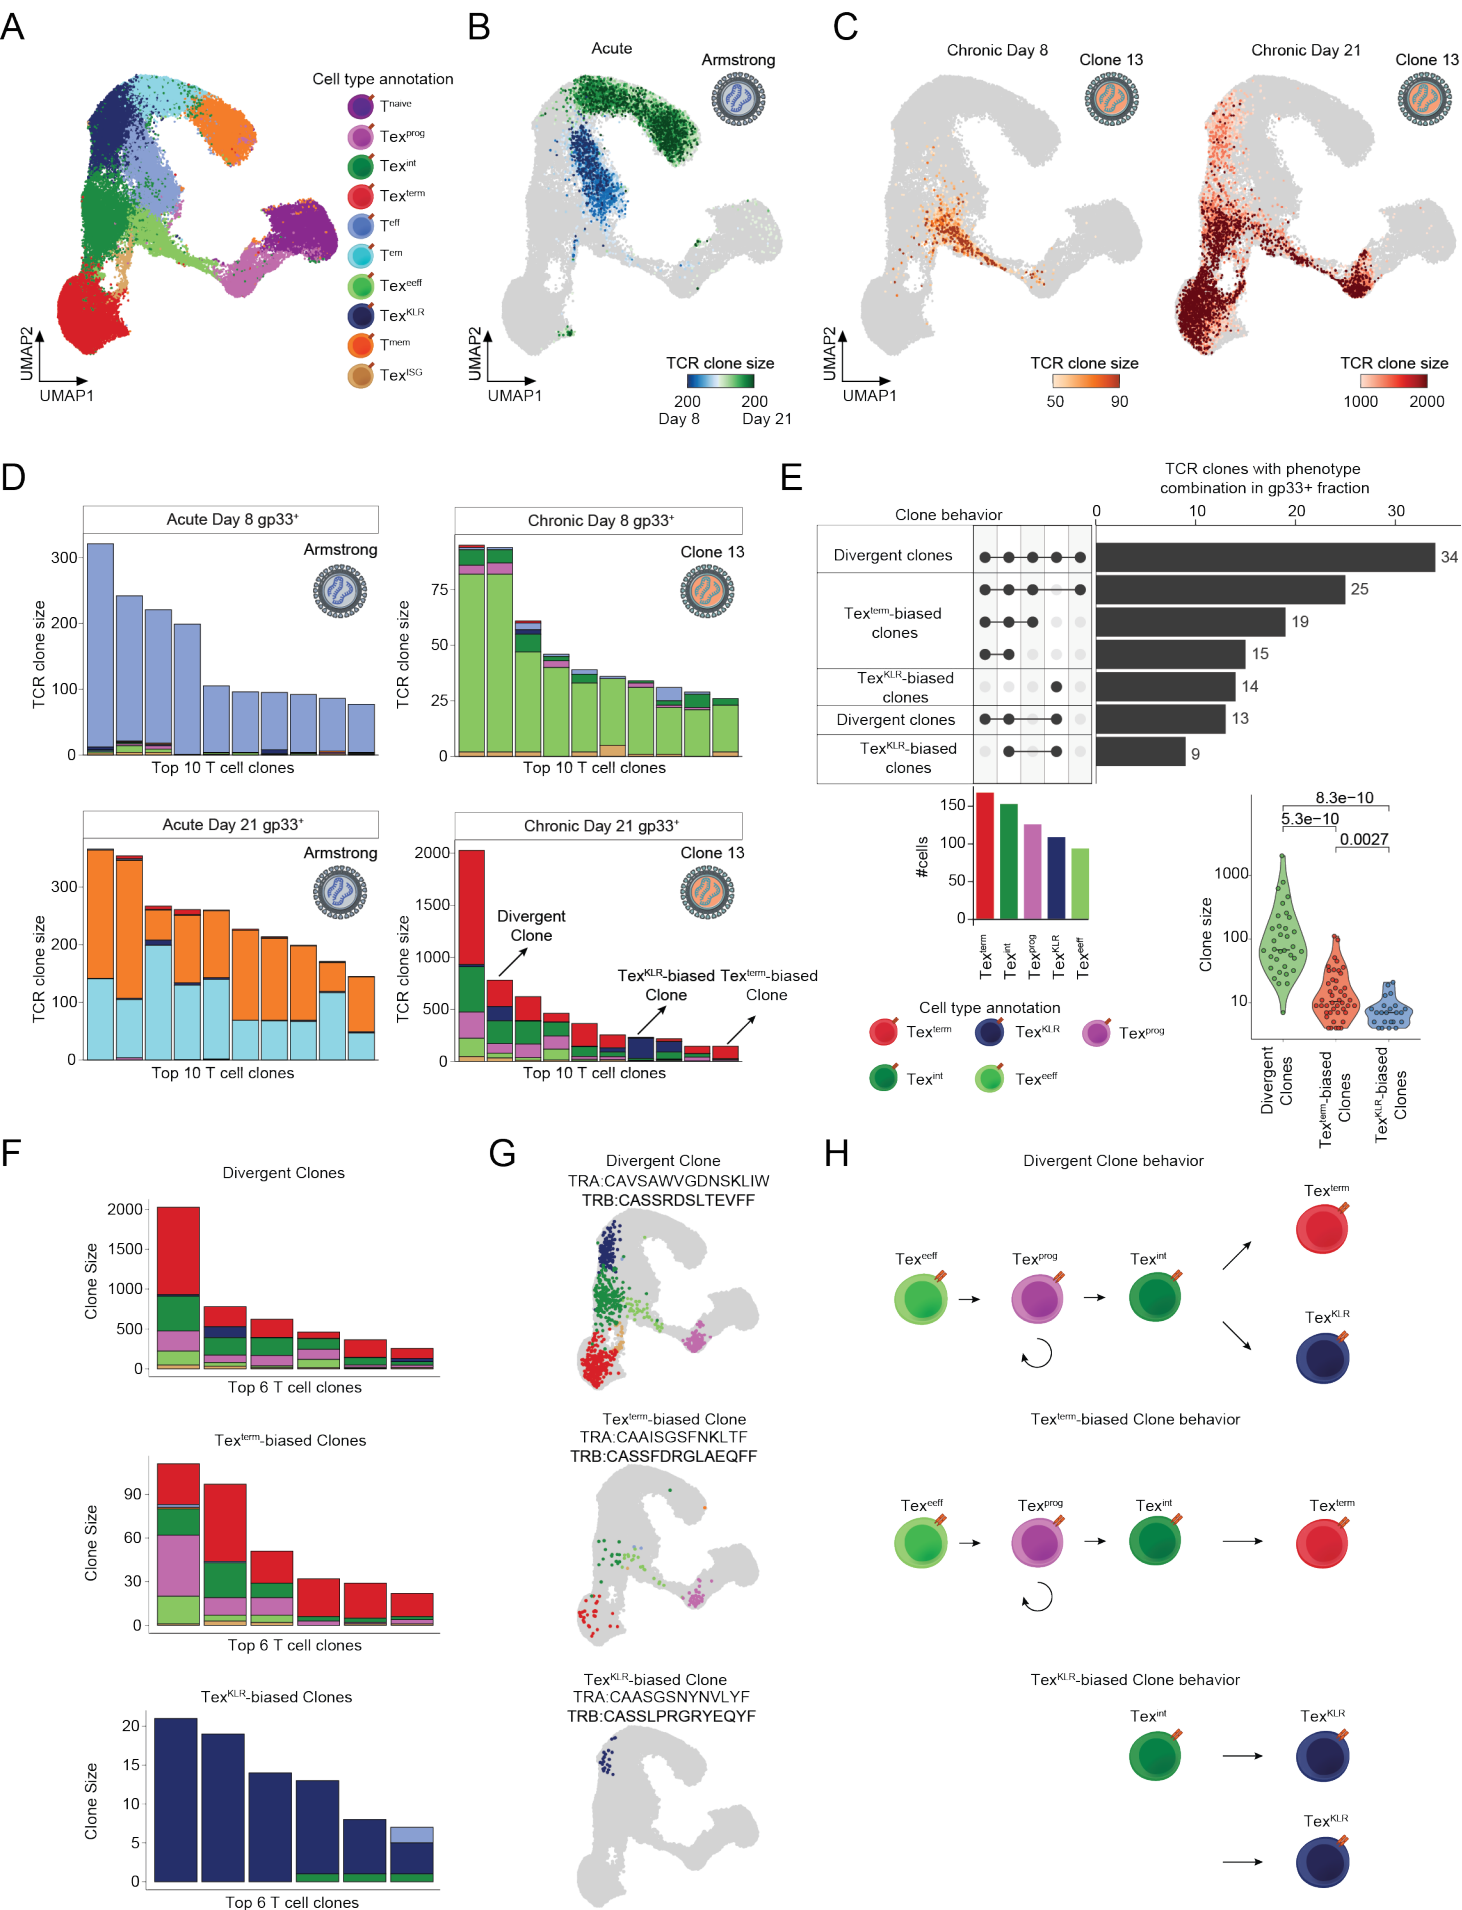

**Figure 4. TCR-based lineage tracing reveals divergent Tex clonal trajectories.**

**(A)** UMAP of scRNA-seq results from the gp33<sup>+</sup> and gp33<sup>-</sup> T cell fractions of the Arm and CI13 infection model from D8 and D21 following infection. UMAP is colored by the annotated T cell subsets. **(B)** UMAP of scRNA-seq results colored by the size of the detected TCR clones at D8 and D21 in the Arm infection model. **(C)** UMAP of scRNA-seq results colored by the size of the detected TCR clones at D8 in the CI13 infection model (left). Same UMAP colored by the TCR clone size at the D21 time point in the CI13 infection model (right). **(D)** Stacked bar plot of the phenotypic distribution of the top 10 expanded clones in the gp33<sup>+</sup> fraction of Arm D8 and D21 samples (left). Same stacked bar plots representing the top 10 expanded clones in the CI13 infection model (right). **(E)** Upset plot depicting the expanded clones with specific phenotype combinations (clone behaviors). Barplot shows the number of cells with the indicated phenotypes that make up the expanded clones. Violin plot shows the clone size distribution of the detected clone behaviors. **(F)** Stacked bar plots show the top 6 expanded clones with the indicated clone behaviors. **(G)** UMAPs show representative examples for the detected clone behaviors. **(H)** Scheme on the phenotypic composition and the potential differentiation trajectories of the identified clone behaviors.

**Figure 5.**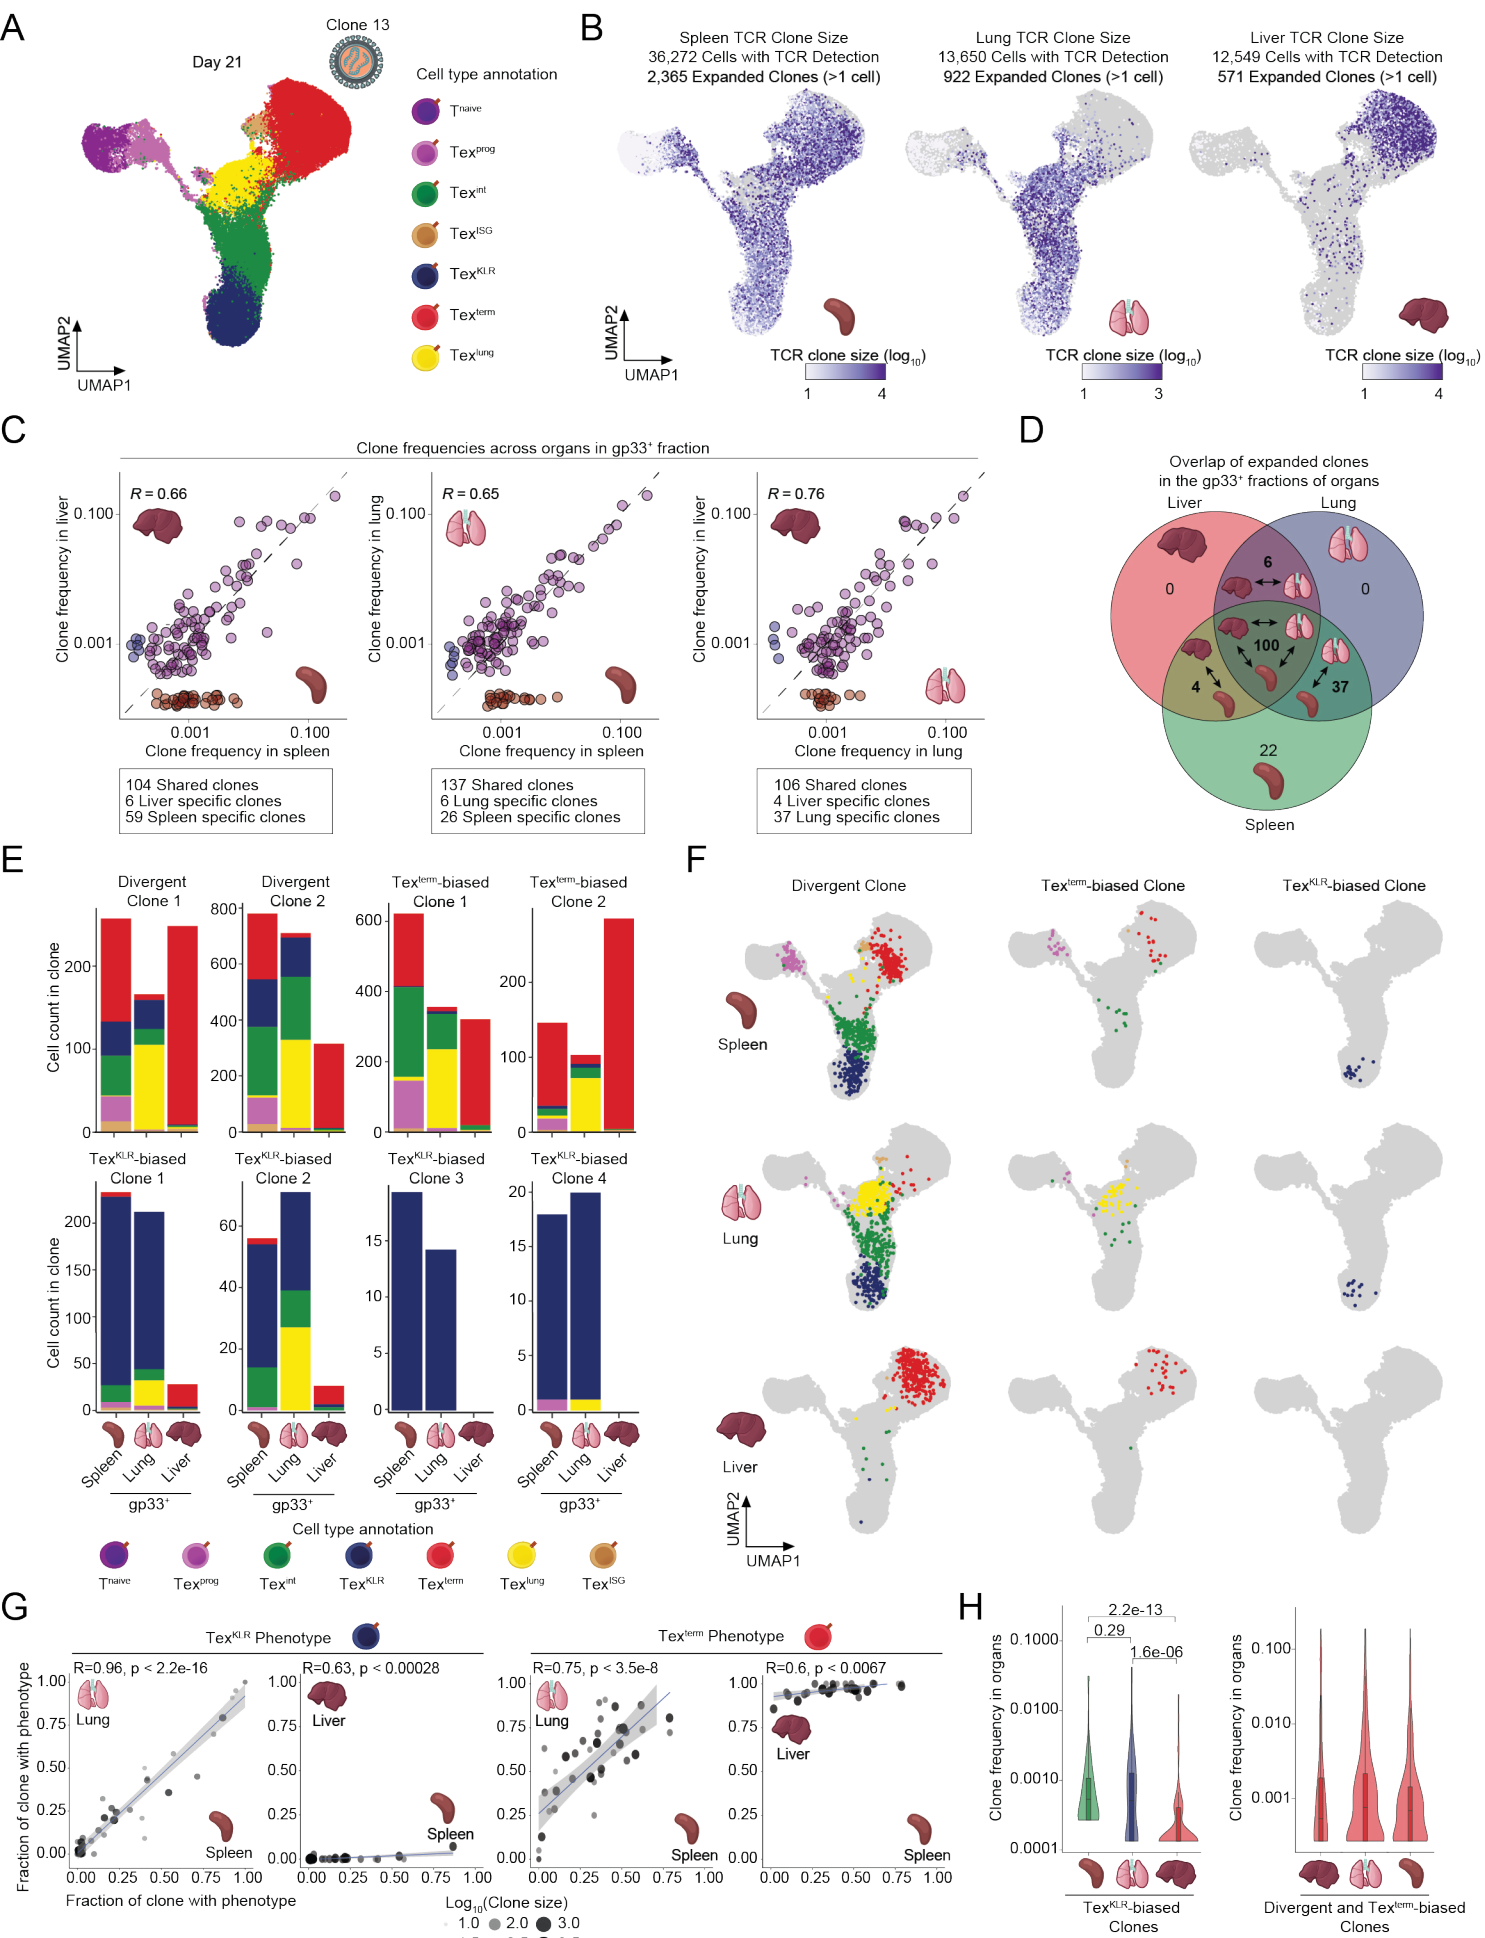

**Figure 5. Conserved clonal T cell trajectories across organs and depletion of  $\text{Tex}^{\text{KLR}}$  in the liver microenvironment.**

**(A)** UMAP of organ-derived T cells at D21 in CI13 infection colored by the annotated T cell subsets. **(B)** UMAPs colored by the detected TCR clone sizes in the different organs. **(C)** Scatterplots depicting the frequencies of expanded T cell clones from the indicated organ comparisons. The correlation coefficient, and specific and shared clone numbers are indicated for each comparison. **(D)** Venn diagram depicting the overlap of expanded T cell clones in the gp33<sup>+</sup> fraction of the indicated organs. **(E)** Stacked bar plot of the phenotypic composition of individual clones across organs. **(F)** UMAPs depict individual clones with specific clone behaviors among organs. **(G)** Scatter plots showing the fraction of the shared clones with  $\text{Tex}^{\text{KLR}}$  and  $\text{Tex}^{\text{term}}$  phenotypes between the indicated organs. **(H)** Violin plot depicts  $\text{Tex}^{\text{KLR}}$ -biased clone frequencies across the organs, which includes clones with >50%  $\text{Tex}^{\text{KLR}}$  phenotype (left). Violin plot of  $\text{Tex}^{\text{term}}$ -biased and divergent clone frequencies across the organs.



**Figure 6.****A**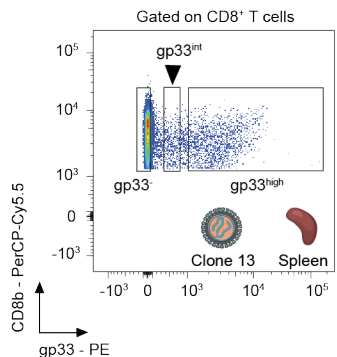**B**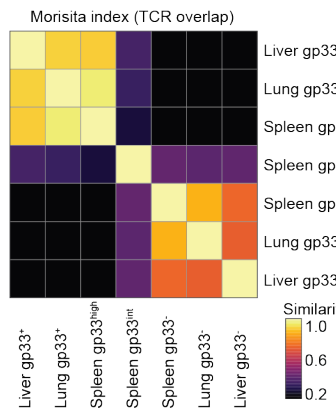**C**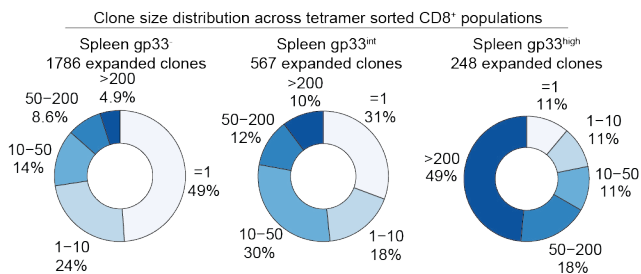**D**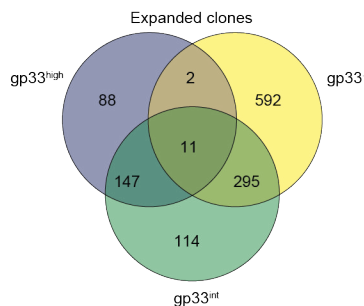**E**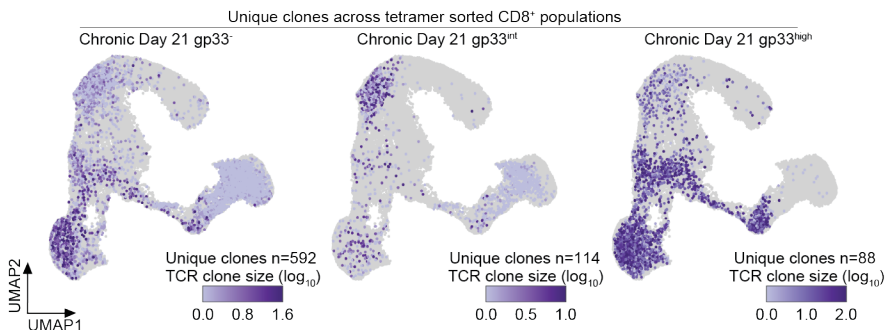**F**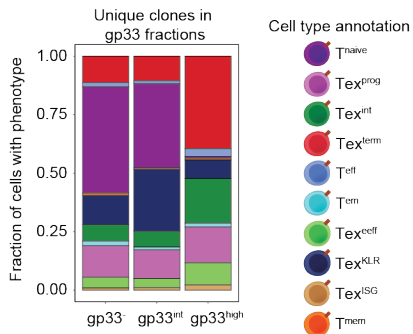**G**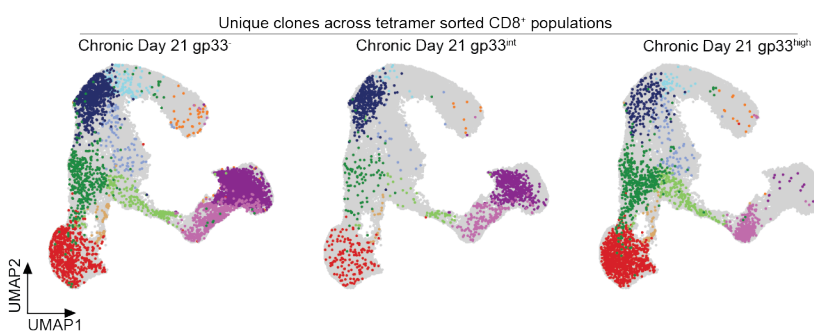**H**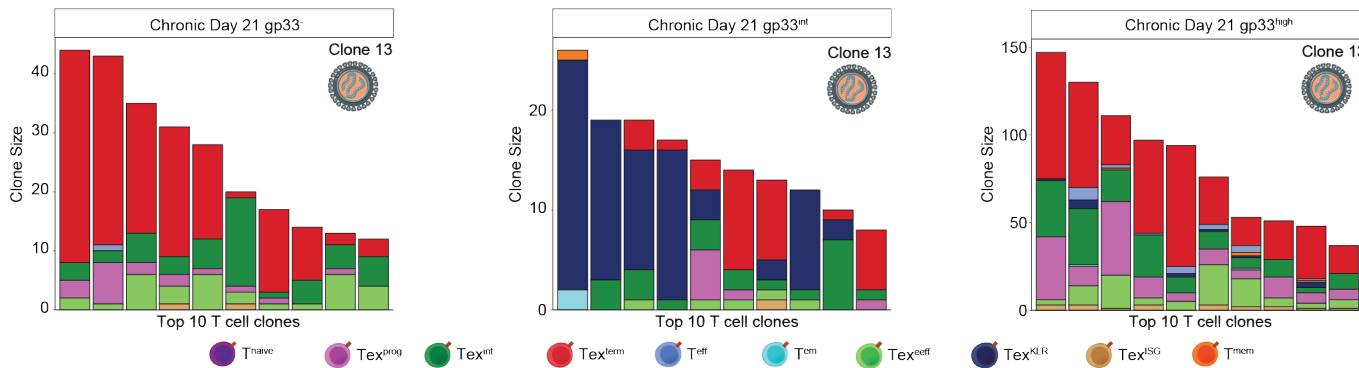**I**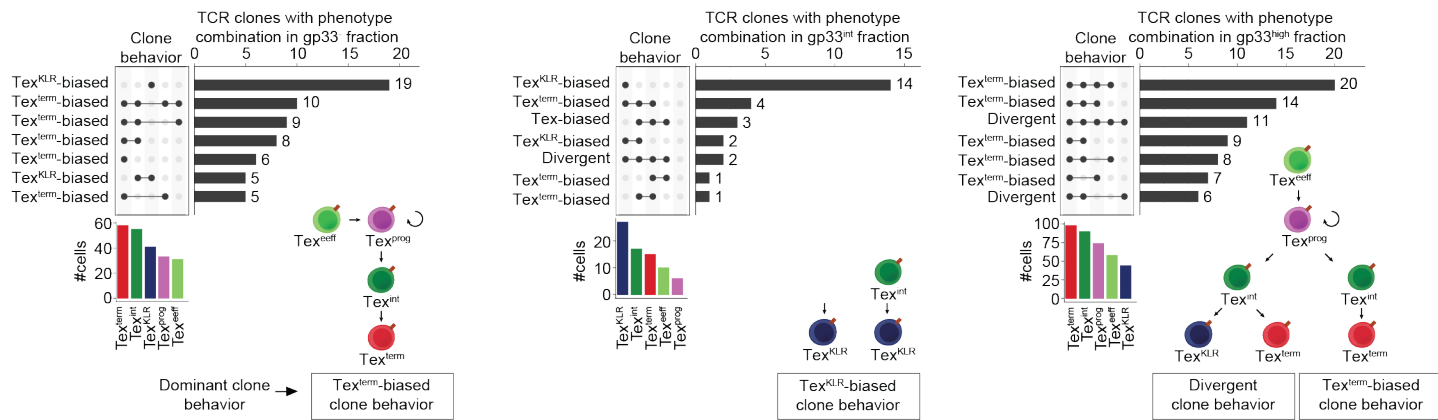

**Figure 6. Differences in TCR signal strength regulate clonal differentiation of Tex<sup>KLR</sup> and Tex<sup>term</sup>.**

**(A)** Sorting strategy to obtain gp33<sup>-</sup>, gp33<sup>int</sup> and gp33<sup>high</sup> T cell populations from the spleen of LCMV-Cl13 infected animals 21 days following infection. **(B)** Heat map depicting TCR repertoire overlap (Morisita index) among the different gp33 fractions from the indicated samples. **(C)** Pie chart representation of the fraction of the detected clone sizes in the three gp33 T cell fractions. **(D)** Venn diagram depicts the overlap of the expanded clones from the gp33 T cell fractions. **(E)** UMAPs colored by size of the unique expanded clones in the three gp33 T cell fractions. **(F)** Stacked bar plot of the phenotypic distribution of the unique expanded clones of the three gp33 T cell fractions. **(G)** UMAPs visualizing the unique expanded clones of the three gp33 T cell fractions colored by the annotated T cell subsets. **(H)** Stacked bar plot of the top 10 uniquely expanded T cell clones from the three gp33 T cell fractions colored by the annotated T cell phenotypes. **(I)** Upset plots depict the unique expanded clones with specific phenotype combinations (clonotype behavior) from the three gp33 T cell fractions. Barplots show the number of cells with the indicated phenotypes. Dominant clone behaviors are indicated at the bottom.

**Figure S1.**

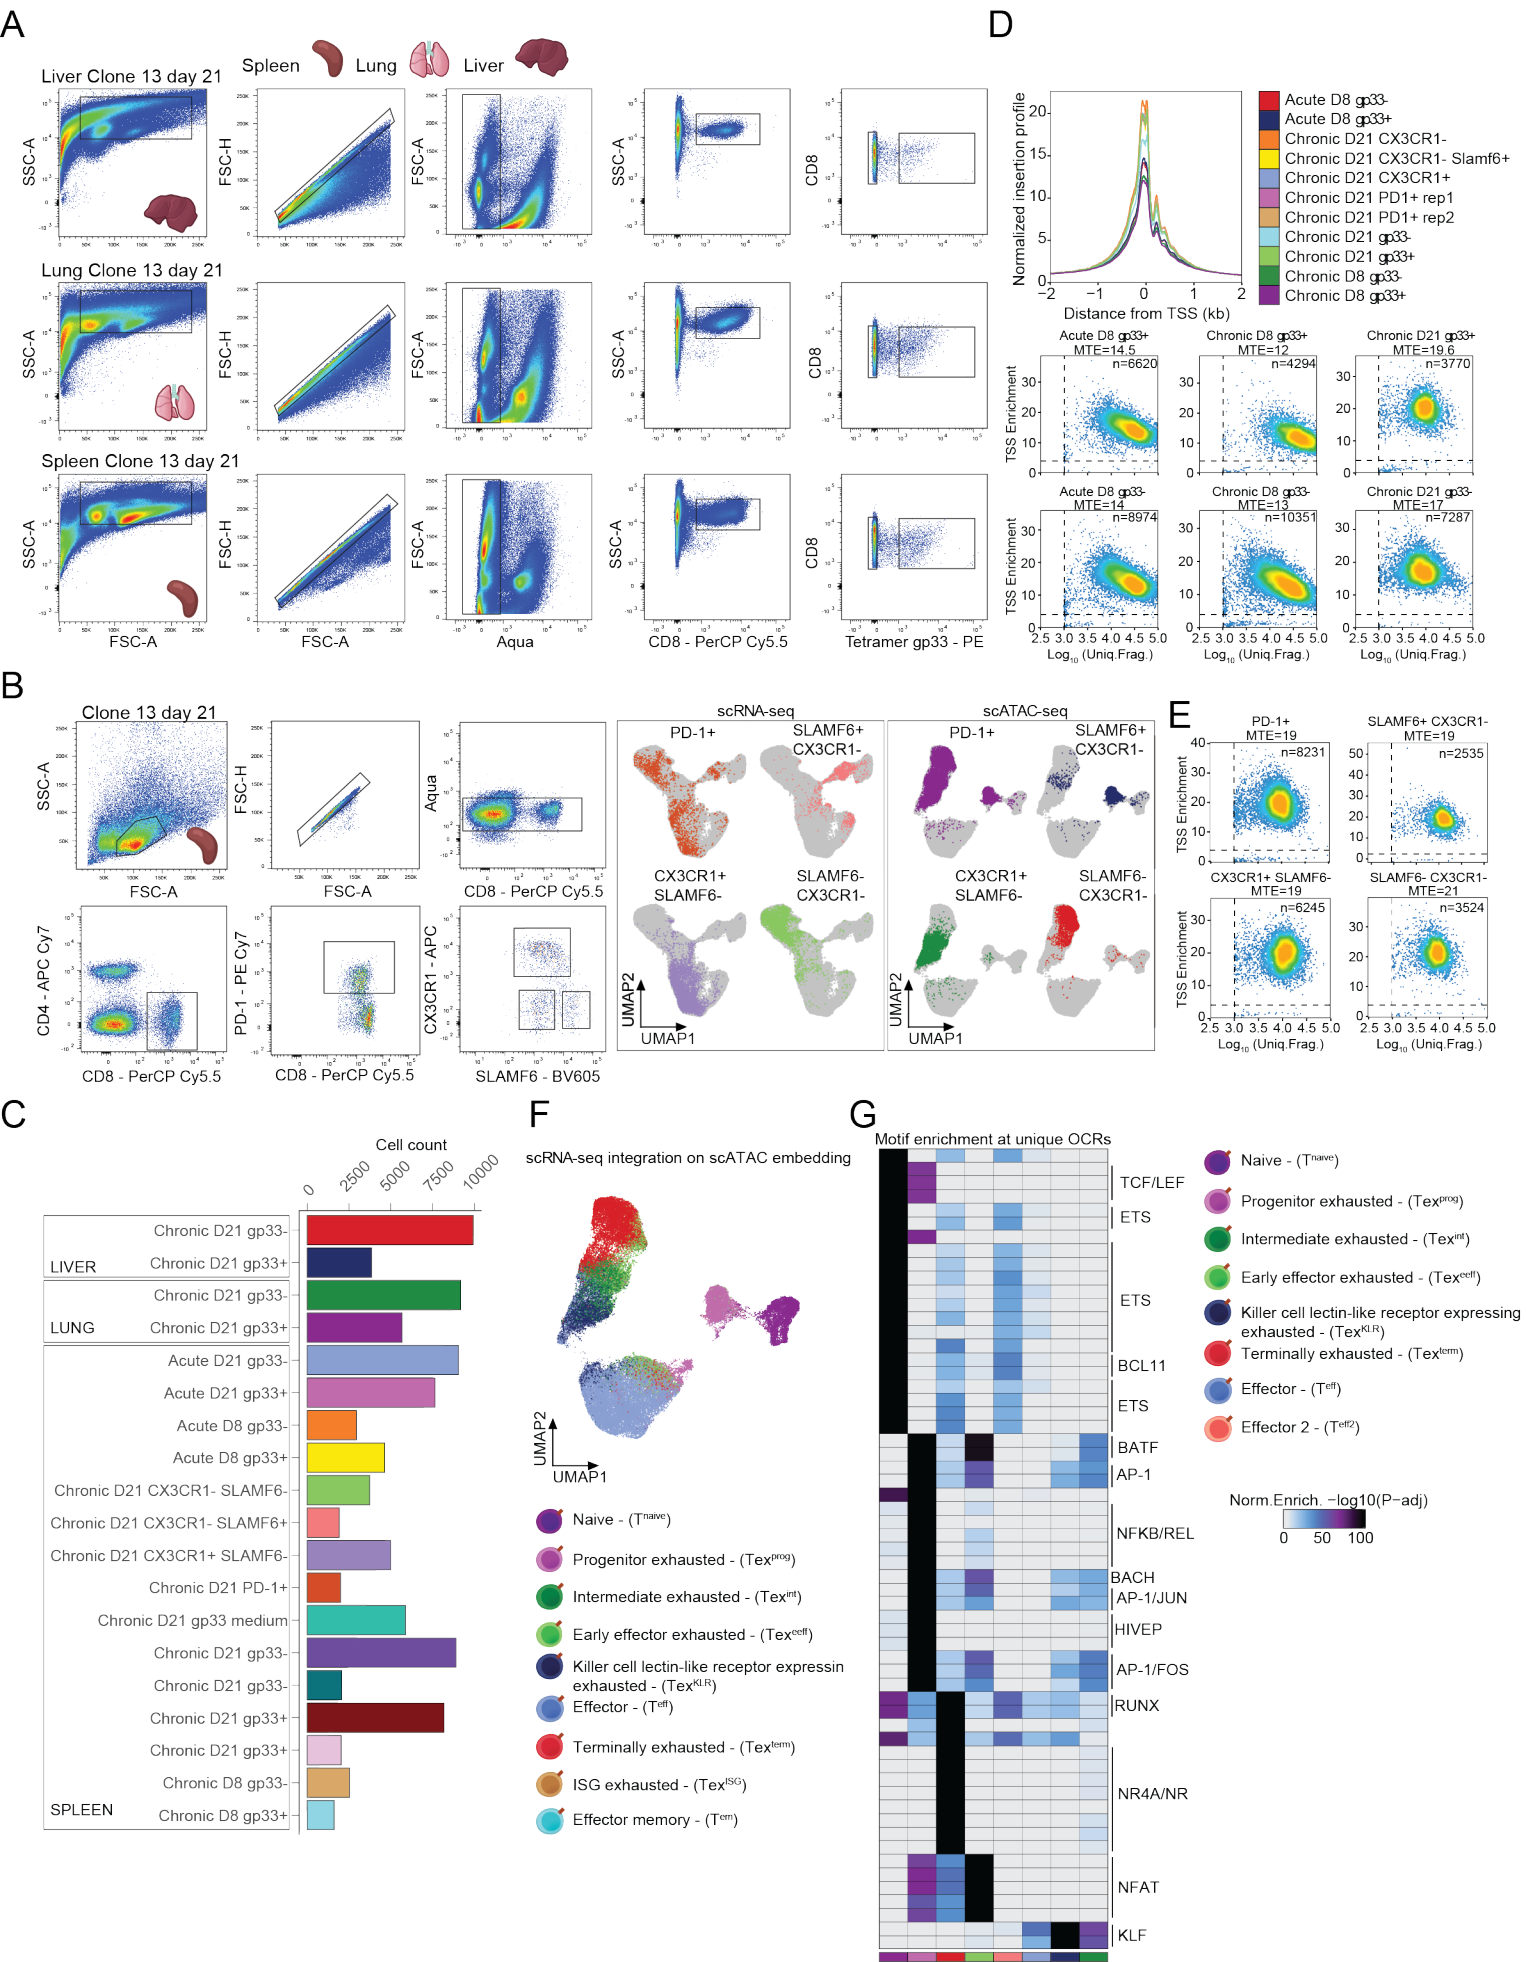

**Figure S1. Sorting strategy and quality controls of scATAC-seq data. Related to Figure 1.**

**(A)** Sorting strategy to obtain antigen specific gp33<sup>+</sup> and gp33<sup>-</sup> CD8<sup>+</sup> T cells from different organs. **(B)** Sorting strategy to obtain the main exhausted T cell subsets (left). UMAPs of scRNA-seq and scATAC-seq results, originating from the main, indicated exhausted T cell subsets. **(C)** Bar plot representation of cell counts from the scRNA-seq results. **(D)** Quality control of scATAC-seq data. Histogram shows normalized read enrichment on the transcription start sites (TSS) of genes from the indicated samples (top). Density plots depict the cells that passed the TSS enrichment and Log<sub>10</sub> unique fragment count threshold. Median TSS enrichment (MTE) is also indicated. **(E)** Density plots of scATAC-seq data from the main exhausted T cell populations depicting the same quality controls as on panel C. **(F)** UMAP of scATAC-seq data colored by the integrated scRNA-seq cluster labels. **(G)** Heat map of motif enrichments at the specific open chromatin regions (OCRs) of the annotated T cell populations.

Figure S2.

A

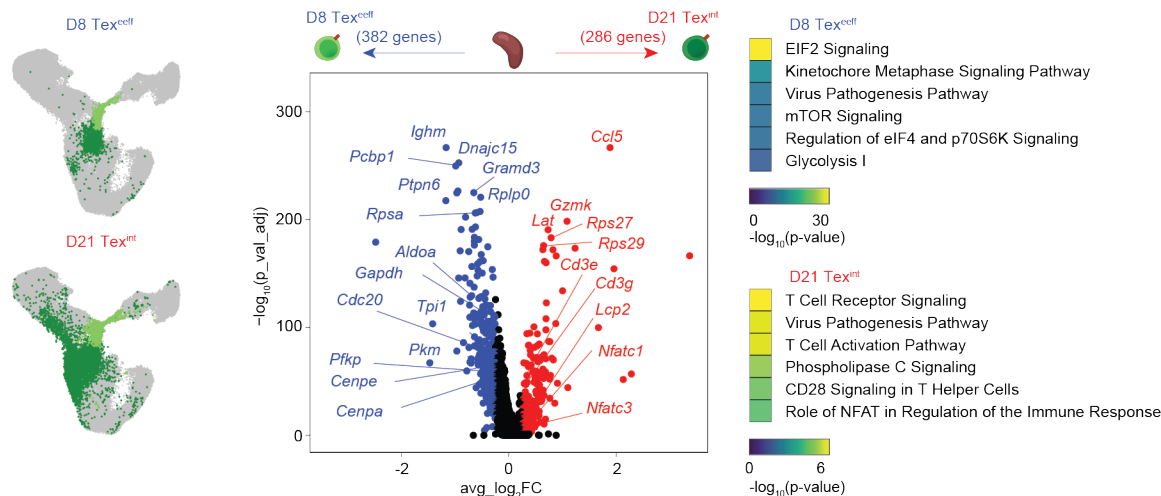

B

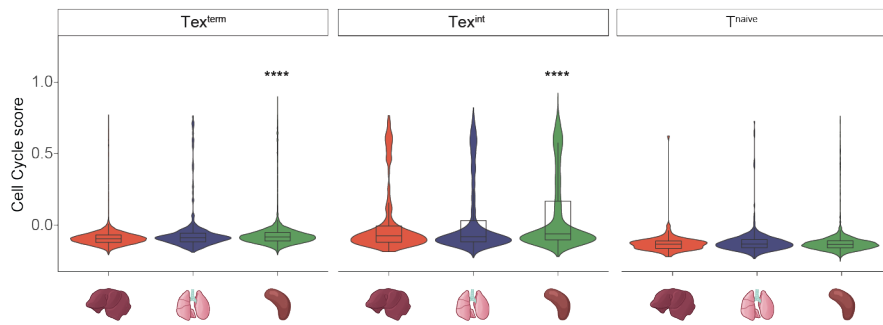

**Figure S2. Early effector exhausted cells and intermediate exhausted T cells are phenotypically different populations with distinct temporal appearance. Related to Figure 2.**

**(A)** UMAPs visualize the early effector exhausted population at D8 and the intermediate exhausted population at D21 (left). Volcano plot depicts the differentially expressed genes between the two populations (middle). Ingenuity pathway analysis results depict the top 6 enriched biological terms in the two populations. **(B)** Violin plots depict the Cell Cycle score of the indicated T cell populations across the indicated organs.

**Figure S3.**

**A**

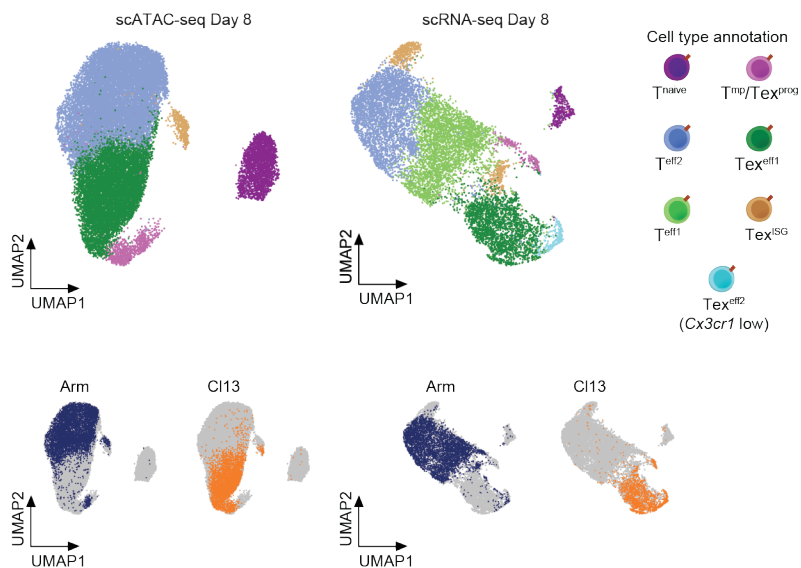

**B**

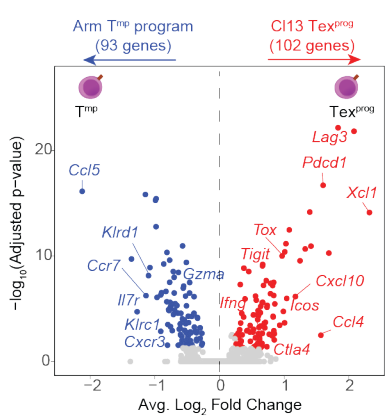

**D**

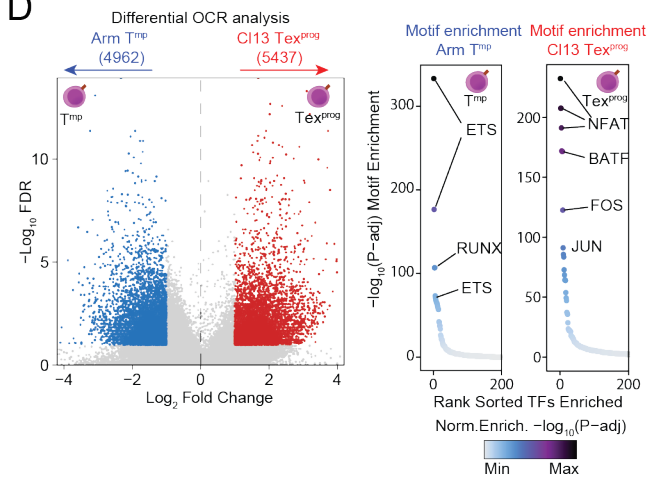

**E**

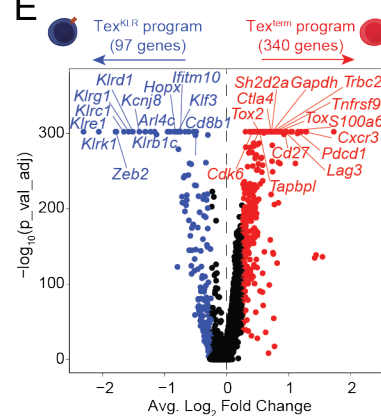

**C**

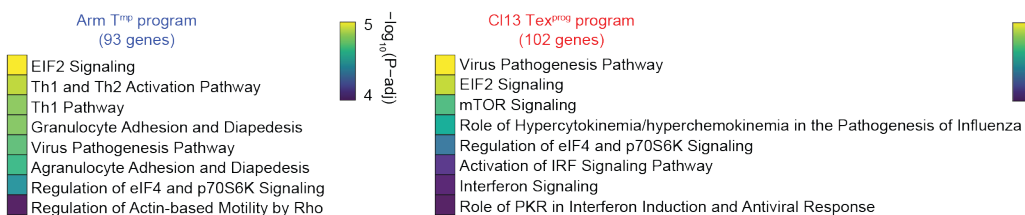

**F**

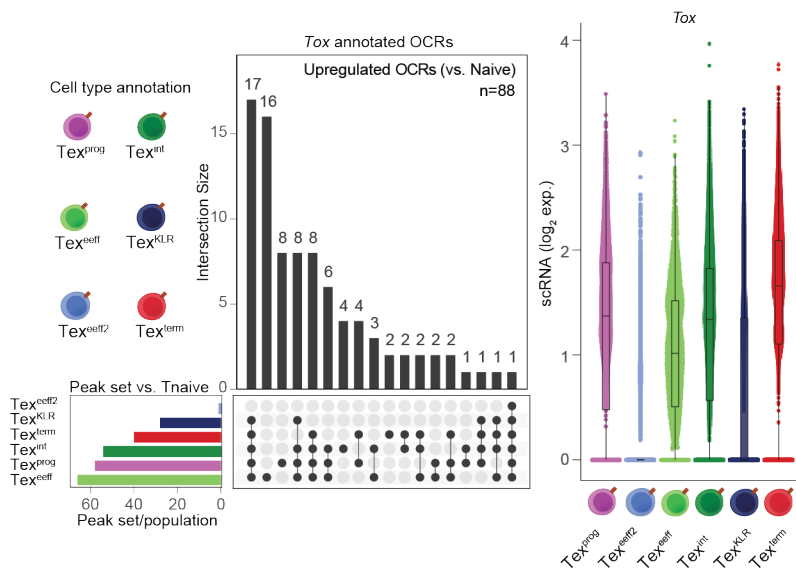

**Figure S3. Early progenitor exhausted T cells possess the molecular program of exhaustion. Related to Figure 3.**

**(A)** UMAPs depict scATAC-seq (left) and scRNA-seq (right) results from the D8 Arm and CI13 infections. Cells on the small UMAPs are colored by their origin from the two infection models (bottom). **(B)** Volcano plot of differentially expressed genes between the memory precursor T cells ( $T^{mp}$ ) of the Arm and the progenitor exhausted T cells ( $Tex^{prog}$ ) of the CI13 infection model. **(C)** Ingenuity pathway analyses of the  $T^{mp}$  and  $Tex^{prog}$  specific gene sets. Top 8 enriched biological terms are shown. **(D)** Volcano plot depicts the differential open chromatin regions (OCRs) of the  $T^{mp}$  and  $Tex^{prog}$  populations (left). Hockey stick plots show the enriched transcription factor motifs at the specific OCR sets of the  $T^{mp}$  and  $Tex^{prog}$  subsets. **(E)** Volcano plot of the differentially expressed genes between the  $Tex^{KLR}$  and  $Tex^{term}$  subsets. **(F)** Upset plot of differentially accessible OCRs annotated to the *Tox* gene relative to  $T^{naive}$  cells and their overlap among the different *Tex* cell subsets. Violin plot shows the gene expression level of *Tox* in the identified *Tex* subsets.



**Figure S4.**

**A**

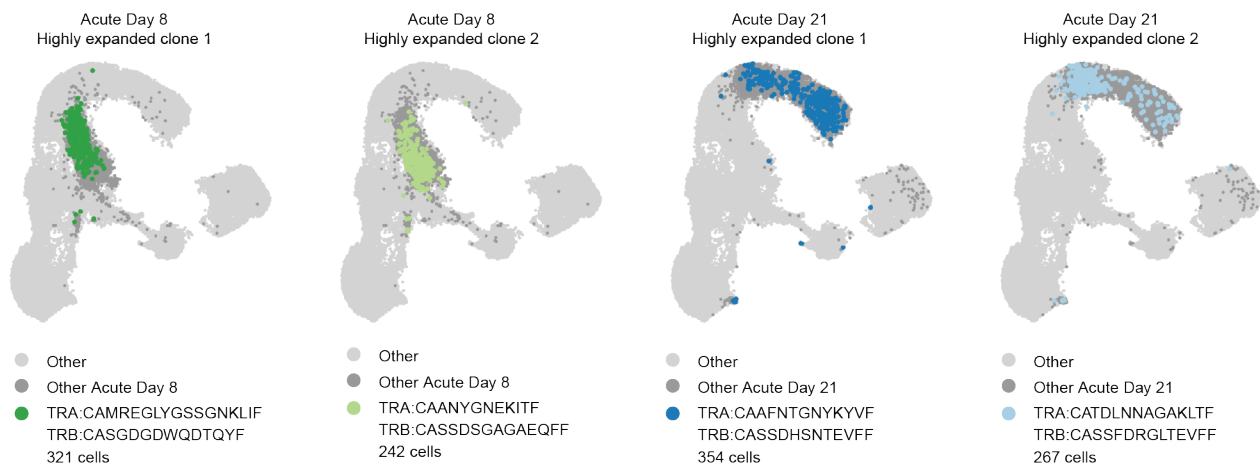

**B**

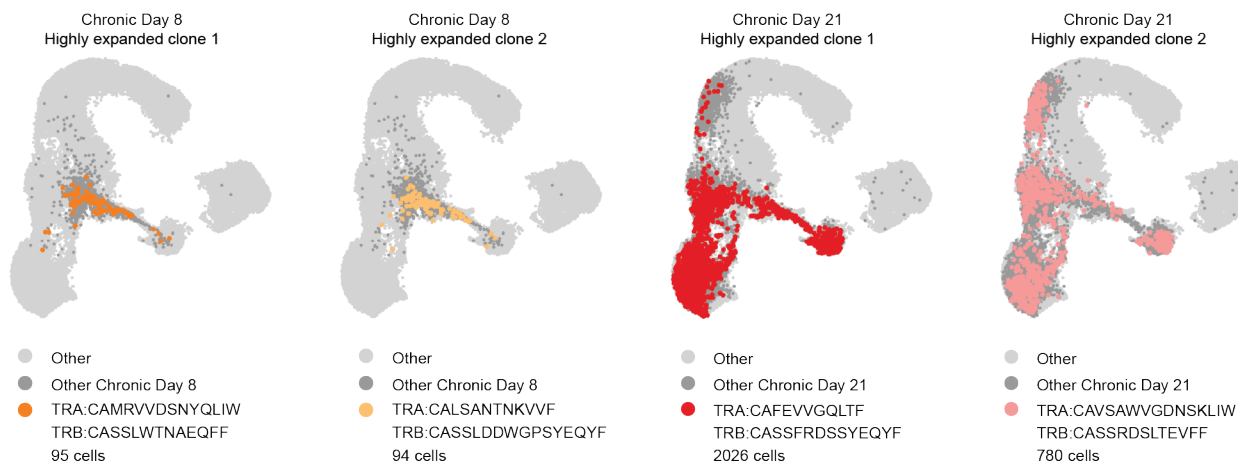

**C**

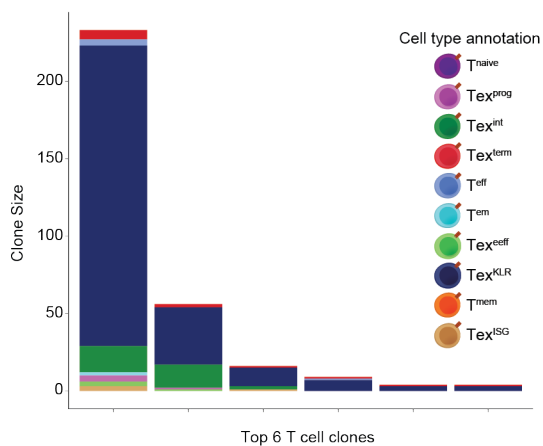

**D**

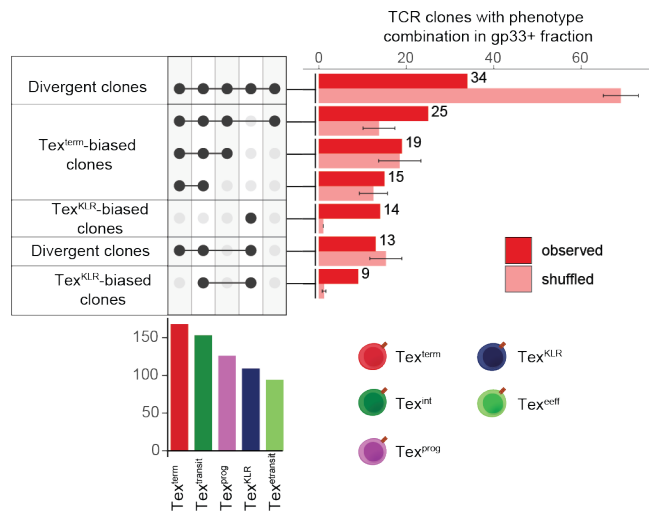

**Figure S4. Highly expanded clones of the Arm and C113 infection model describe the dominant clone behaviors of exhausted T cell differentiation. Related to Figure 4.**

**(A)** UMAPs depict highly expanded clones from the Arm infection model at the indicated time points. **(B)** UMAPs depict highly expanded clones of the C113 infection model at the indicated time points. **(C)** Stacked bar plot of the phenotypic composition of individual T cell clones with a bias towards the  $\text{Tex}^{\text{KLR}}$  fate, but also exhibiting the  $\text{Tex}^{\text{term}}$  phenotype. Top 6 clones are shown. **(D)** Upset plot of the phenotype combinations of the observed and shuffled TCR clones.

**Figure S5.**

**A**

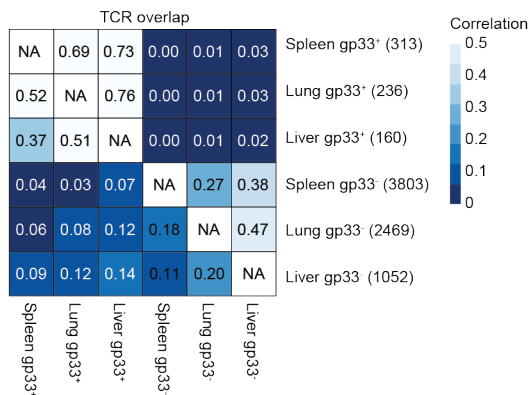

**B**

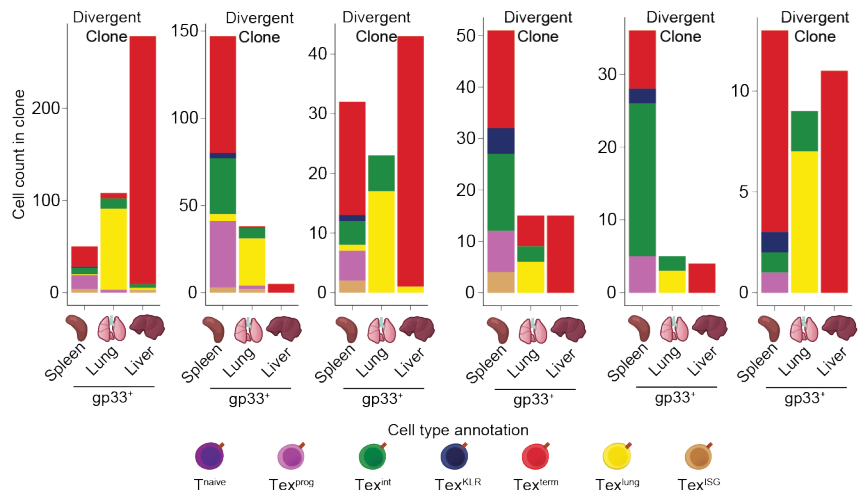

**C**

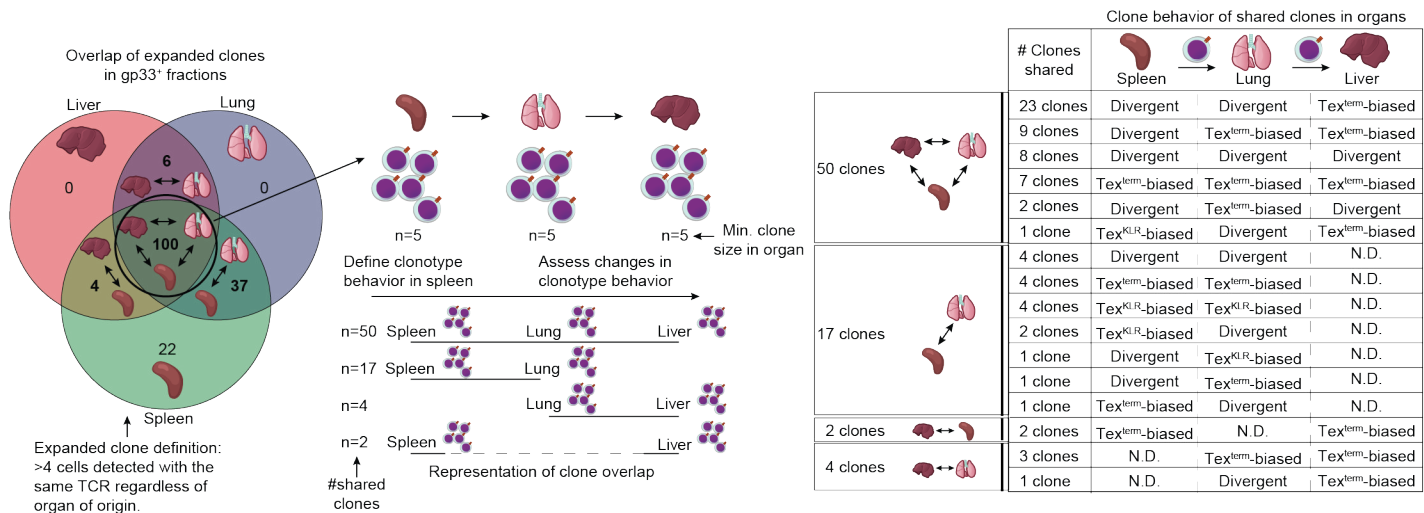

**Figure S5. scRNA/TCR-seq reveals the clone behaviors of different organs. Related to Figure 5.**

**(A)** Heat map representation of the correlation between the TCR repertoires of the indicated gp33<sup>+</sup> and gp33<sup>-</sup> CD8<sup>+</sup> T cell subsets from different organs. **(B)** Stacked bar plot of the phenotypic composition of individual clones across organs. **(C)** Schematics show the definition of an expanded, organ-shared T cell clone for clone behavior analysis. Only those clones were considered that had at least 5 T cells present in each organ. Shared clone numbers across the organs are indicated (left). Table depicting the number of expanded clones that are shared across tissues and their clone behaviors (right).

**Figure S6.****A**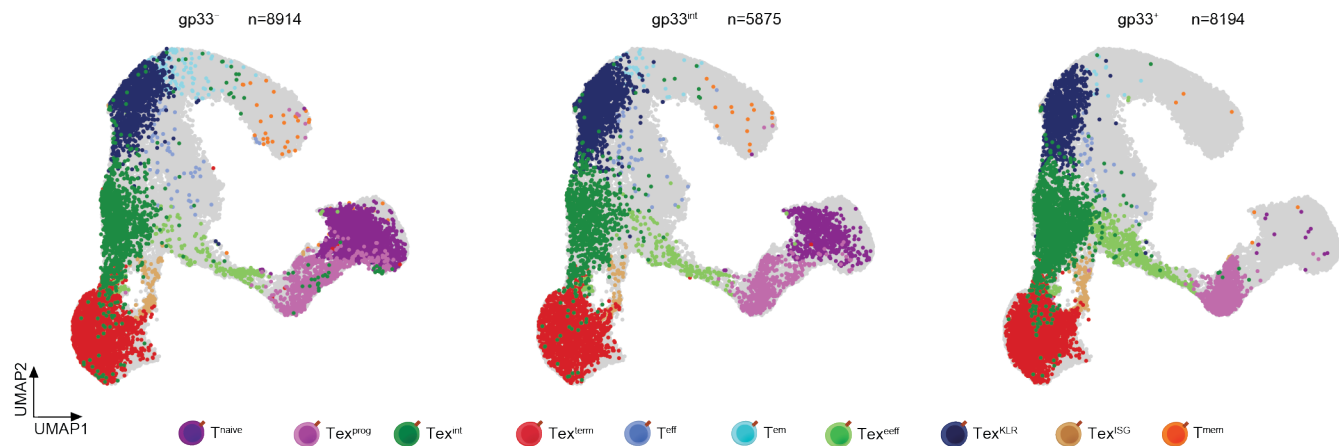**B**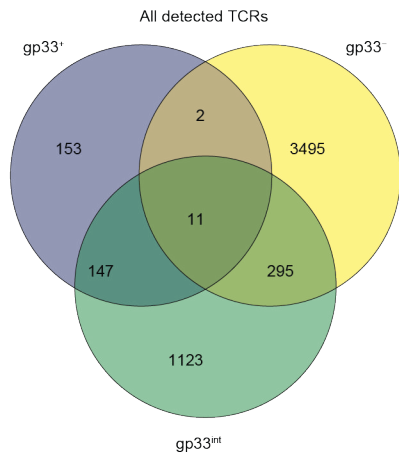

**Figure S6. scRNA-seq reveals the phenotypic composition of T cell subsets with different affinities to recognize the immunodominant viral epitope. Related to Figure 6.**

**(A)** UMAPs of scRNA-seq results colored by the phenotypic distribution of the three gp33 fractions of T cells. **(B)** Venn diagram shows the overlap of all detected TCR clones among the three gp33 T cell fractions.
